# Supplementary material for: Stage-Dependent Disruptions in Neurogenesis and Neurotrophins’ Production Following Prenatal and Postnatal Valproic Acid Exposure: Implications for Autism Spectrum Disorders
Source: Research Square preprint supplement (doi:10.21203/rs.3.rs-5920890/v1), 2025-04-10
Supplement: Supplementary file 1 [file 4d0391ca970a54e0c7dd5884.pdf]

The western blotting results of the tests for normality and variance homogeneity

### Figure 2 A. Synaptophysin

Test for normal distribution

Shapiro-Wilk test

|                                     |        |        |
|-------------------------------------|--------|--------|
| W                                   | 0.9575 | 0.9349 |
| P value                             | 0.8002 | 0.6187 |
| Passed normality test (alpha=0.05)? | Yes    | Yes    |
| P value summary                     | ns     | ns     |
| Number of values                    | 6      | 6      |

|                                            |                    |
|--------------------------------------------|--------------------|
| Column B                                   | PreVPA             |
| vs.                                        | vs.                |
| Column A                                   | Control            |
| Unpaired t test                            |                    |
| P value                                    | <0.0001            |
| P value summary                            | ****               |
| Significantly different (P < 0.05)?        | Yes                |
| One- or two-tailed P value?                | Two-tailed         |
| t, df                                      | t=12.96, df=10     |
| How big is the difference?                 |                    |
| Mean of column A                           | 28.21              |
| Mean of column B                           | 6.258              |
| Difference between means (B - A) $\pm$ SEM | -21.95 $\pm$ 1.694 |
| 95% confidence interval                    | -25.73 to -18.18   |
| R squared (eta squared)                    | 0.9438             |
| F test to compare variances                |                    |
| F, DFn, Dfd                                | 1.585, 5, 5        |
| P value                                    | 0.6255             |
| P value summary                            | ns                 |
| Significantly different (P < 0.05)?        | No                 |
| Data analyzed                              |                    |
| Sample size, column A                      | 6                  |
| Sample size, column B                      | 6                  |

### Figure 2 A. GFAP

Test for normal distribution

Shapiro-Wilk test

|                                     |        |        |
|-------------------------------------|--------|--------|
| W                                   | 0.9631 | 0.8820 |
| P value                             | 0.8434 | 0.2782 |
| Passed normality test (alpha=0.05)? | Yes    | Yes    |
| P value summary                     | ns     | ns     |
| Number of values                    | 6      | 6      |

|                 |         |
|-----------------|---------|
| Column B        | PreVPA  |
| vs.             | vs.     |
| Column A        | Control |
| Unpaired t test |         |

|                                        |                |
|----------------------------------------|----------------|
| P value                                | <0.0001        |
| P value summary                        | ****           |
| Significantly different (P < 0.05)?    | Yes            |
| One- or two-tailed P value?            | Two-tailed     |
| t, df                                  | t=11.73, df=10 |
| How big is the difference?             |                |
| Mean of column A                       | 11.31          |
| Mean of column B                       | 28.26          |
| Difference between means (B - A) ± SEM | 16.95 ± 1.445  |
| 95% confidence interval                | 13.73 to 20.17 |
| R squared (eta squared)                | 0.9322         |
| F test to compare variances            |                |
| F, DFn, Dfd                            | 6.064, 5, 5    |
| P value                                | 0.0698         |
| P value summary                        | ns             |
| Significantly different (P < 0.05)?    | No             |
| Data analyzed                          |                |
| Sample size, column A                  | 6              |
| Sample size, column B                  | 6              |

## Figure 2 A. Doublecortin

|                                     |        |        |
|-------------------------------------|--------|--------|
| Test for normal distribution        |        |        |
| Shapiro-Wilk test                   |        |        |
| W                                   | 0.9732 | 0.9355 |
| P value                             | 0.9134 | 0.6228 |
| Passed normality test (alpha=0.05)? | Yes    | Yes    |
| P value summary                     | ns     | ns     |
| Number of values                    | 6      | 6      |

|                                        |                 |
|----------------------------------------|-----------------|
| Table Analyzed                         | DCX PFC P14     |
| Column B                               | PreVPA          |
| vs.                                    | vs.             |
| Column A                               | Control         |
| Unpaired t test                        |                 |
| P value                                | 0.4625          |
| P value summary                        | ns              |
| Significantly different (P < 0.05)?    | No              |
| One- or two-tailed P value?            | Two-tailed      |
| t, df                                  | t=0.7640, df=10 |
| How big is the difference?             |                 |
| Mean of column A                       | 15.39           |
| Mean of column B                       | 16.22           |
| Difference between means (B - A) ± SEM | 0.8283 ± 1.084  |
| 95% confidence interval                | -1.587 to 3.244 |
| R squared (eta squared)                | 0.05515         |
| F test to compare variances            |                 |
| F, DFn, Dfd                            | 2.049, 5, 5     |
| P value                                | 0.4500          |
| P value summary                        | ns              |

|                                         |    |
|-----------------------------------------|----|
| Significantly different ( $P < 0.05$ )? | No |
| Data analyzed                           |    |
| Sample size, column A                   | 6  |
| Sample size, column B                   | 6  |

### Figure 2 A. NeuN

|                                          |        |        |
|------------------------------------------|--------|--------|
| Test for normal distribution             |        |        |
| Shapiro-Wilk test                        |        |        |
| W                                        | 0.9041 | 0.9910 |
| P value                                  | 0.3988 | 0.9916 |
| Passed normality test ( $\alpha=0.05$ )? | Yes    | Yes    |
| P value summary                          | ns     | ns     |
| Number of values                         | 6      | 6      |

|                                            |                     |
|--------------------------------------------|---------------------|
| Table Analyzed                             | NeuN PFC P14        |
| Column B                                   | PreVPA              |
| vs.                                        | vs.                 |
| Column A                                   | Control             |
| Unpaired t test                            |                     |
| P value                                    | <0.0001             |
| P value summary                            | ****                |
| Significantly different ( $P < 0.05$ )?    | Yes                 |
| One- or two-tailed P value?                | Two-tailed          |
| t, df                                      | t=8.853, df=10      |
| How big is the difference?                 |                     |
| Mean of column A                           | 19.48               |
| Mean of column B                           | 12.92               |
| Difference between means (B - A) $\pm$ SEM | -6.558 $\pm$ 0.7408 |
| 95% confidence interval                    | -8.208 to -4.907    |
| R squared (eta squared)                    | 0.8868              |
| F test to compare variances                |                     |
| F, DFn, Dfd                                | 1.853, 5, 5         |
| P value                                    | 0.5149              |
| P value summary                            | ns                  |
| Significantly different ( $P < 0.05$ )?    | No                  |
| Data analyzed                              |                     |
| Sample size, column A                      | 6                   |
| Sample size, column B                      | 6                   |

### Figure 2, C. GFAP

|                                          |        |        |
|------------------------------------------|--------|--------|
| Test for normal distribution             |        |        |
| Shapiro-Wilk test                        |        |        |
| W                                        | 0.9373 | 0.9576 |
| P value                                  | 0.6373 | 0.8013 |
| Passed normality test ( $\alpha=0.05$ )? | Yes    | Yes    |
| P value summary                          | ns     | ns     |
| Number of values                         | 6      | 6      |

|                                            |                    |
|--------------------------------------------|--------------------|
| Table Analyzed                             | GFAP PFC Post14    |
| Column B                                   | PostVPA            |
| vs.                                        | vs.                |
| Column A                                   | Control            |
| Unpaired t test                            |                    |
| P value                                    | <0.0001            |
| P value summary                            | ****               |
| Significantly different (P < 0.05)?        | Yes                |
| One- or two-tailed P value?                | Two-tailed         |
| t, df                                      | t=9.087, df=10     |
| How big is the difference?                 |                    |
| Mean of column A                           | 15.10              |
| Mean of column B                           | 21.65              |
| Difference between means (B - A) $\pm$ SEM | 6.553 $\pm$ 0.7211 |
| 95% confidence interval                    | 4.947 to 8.160     |
| R squared (eta squared)                    | 0.8920             |
| F test to compare variances                |                    |
| F, DFn, Dfd                                | 1.573, 5, 5        |
| P value                                    | 0.6312             |
| P value summary                            | ns                 |
| Significantly different (P < 0.05)?        | No                 |
| Data analyzed                              |                    |
| Sample size, column A                      | 6                  |
| Sample size, column B                      | 6                  |

### Figure 2 C. Doublecortin

|                                     |        |        |
|-------------------------------------|--------|--------|
| Test for normal distribution        |        |        |
| Shapiro-Wilk test                   |        |        |
| W                                   | 0.9436 | 0.9426 |
| P value                             | 0.6883 | 0.6801 |
| Passed normality test (alpha=0.05)? | Yes    | Yes    |
| P value summary                     | ns     | ns     |
| Number of values                    | 6      | 6      |

|                                            |                     |
|--------------------------------------------|---------------------|
| Table Analyzed                             | DCX PFC Post14      |
| Column B                                   | PostVPA             |
| vs.                                        | vs.                 |
| Column A                                   | Control             |
| Unpaired t test                            |                     |
| P value                                    | 0.0576              |
| P value summary                            | ns                  |
| Significantly different (P < 0.05)?        | No                  |
| One- or two-tailed P value?                | Two-tailed          |
| t, df                                      | t=2.144, df=10      |
| How big is the difference?                 |                     |
| Mean of column A                           | 19.82               |
| Mean of column B                           | 18.49               |
| Difference between means (B - A) $\pm$ SEM | -1.325 $\pm$ 0.6179 |
| 95% confidence interval                    | -2.702 to 0.05176   |

|                                     |             |
|-------------------------------------|-------------|
| R squared (eta squared)             | 0.3150      |
| F test to compare variances         |             |
| F, DFn, Dfd                         | 4.077, 5, 5 |
| P value                             | 0.1491      |
| P value summary                     | ns          |
| Significantly different (P < 0.05)? | No          |
| Data analyzed                       |             |
| Sample size, column A               | 6           |
| Sample size, column B               | 6           |

### Figure 2 C. NeuN

Test for normal distribution  
Shapiro-Wilk test  
W  
P value  
Passed normality test (alpha=0.05)?  
P value summary  
Number of values

|        |        |
|--------|--------|
| 0.9426 | 0.9696 |
| 0.6801 | 0.8896 |
| Yes    | Yes    |
| ns     | ns     |
| 6      | 6      |

Table Analyzed  
Column B  
vs.  
Column A  
Unpaired t test  
P value  
P value summary  
Significantly different (P < 0.05)?  
One- or two-tailed P value?  
t, df  
How big is the difference?  
Mean of column A  
Mean of column B  
Difference between means (B - A)  $\pm$  SEM  
95% confidence interval  
R squared (eta squared)  
F test to compare variances  
F, DFn, Dfd  
P value  
P value summary  
Significantly different (P < 0.05)?  
Data analyzed  
Sample size, column A  
Sample size, column B

NeuN PFC Post14  
PostVPA  
vs.  
Control  
  
0.0537  
ns  
No  
Two-tailed  
t=2.186, df=10  
  
11.65  
10.43  
-1.228  $\pm$  0.5618  
-2.480 to 0.02343  
0.3234  
  
3.923, 5, 5  
0.1599  
ns  
No  
  
6  
6

### Figure 2 C. Synaptophysin

Test for normal distribution  
Shapiro-Wilk test  
W

|        |        |
|--------|--------|
| 0.9021 | 0.8990 |
|--------|--------|

|                                     |        |        |
|-------------------------------------|--------|--------|
| P value                             | 0.3867 | 0.3682 |
| Passed normality test (alpha=0.05)? | Yes    | Yes    |
| P value summary                     | ns     | ns     |
| Number of values                    | 6      | 6      |

|                                            |                     |
|--------------------------------------------|---------------------|
| Table Analyzed                             | SYP PFC Post14      |
| Column B                                   | PostVPA             |
| vs.                                        | vs.                 |
| Column A                                   | Control             |
| Unpaired t test                            |                     |
| P value                                    | 0.0001              |
| P value summary                            | ***                 |
| Significantly different (P < 0.05)?        | Yes                 |
| One- or two-tailed P value?                | Two-tailed          |
| t, df                                      | t=6.019, df=10      |
| How big is the difference?                 |                     |
| Mean of column A                           | 13.98               |
| Mean of column B                           | 10.13               |
| Difference between means (B - A) $\pm$ SEM | -3.843 $\pm$ 0.6385 |
| 95% confidence interval                    | -5.266 to -2.421    |
| R squared (eta squared)                    | 0.7837              |
| F test to compare variances                |                     |
| F, DFn, Dfd                                | 1.334, 5, 5         |
| P value                                    | 0.7596              |
| P value summary                            | ns                  |
| Significantly different (P < 0.05)?        | No                  |
| Data analyzed                              |                     |
| Sample size, column A                      | 6                   |
| Sample size, column B                      | 6                   |

## Figure 2 E. GFAP

|                                     |        |        |
|-------------------------------------|--------|--------|
| Test for normal distribution        |        |        |
| Shapiro-Wilk test                   |        |        |
| W                                   | 0.8976 | 0.9555 |
| P value                             | 0.3597 | 0.7842 |
| Passed normality test (alpha=0.05)? | Yes    | Yes    |
| P value summary                     | ns     | ns     |
| Number of values                    | 6      | 6      |

|                                     |                |
|-------------------------------------|----------------|
| Table Analyzed                      | GFAP PFC P21   |
| Column B                            | PreVPA         |
| vs.                                 | vs.            |
| Column A                            | Control        |
| Unpaired t test                     |                |
| P value                             | <0.0001        |
| P value summary                     | ****           |
| Significantly different (P < 0.05)? | Yes            |
| One- or two-tailed P value?         | Two-tailed     |
| t, df                               | t=8.229, df=10 |

|                                            |                   |
|--------------------------------------------|-------------------|
| How big is the difference?                 |                   |
| Mean of column A                           | 11.48             |
| Mean of column B                           | 20.67             |
| Difference between means (B - A) $\pm$ SEM | 9.189 $\pm$ 1.117 |
| 95% confidence interval                    | 6.701 to 11.68    |
| R squared (eta squared)                    | 0.8713            |
| F test to compare variances                |                   |
| F, DFn, Dfd                                | 4.062, 5, 5       |
| P value                                    | 0.1502            |
| P value summary                            | ns                |
| Significantly different (P < 0.05)?        | No                |
| Data analyzed                              |                   |
| Sample size, column A                      | 6                 |
| Sample size, column B                      | 6                 |

### Figure 2 E. Doublecortin

|                                     |        |        |
|-------------------------------------|--------|--------|
| Test for normal distribution        |        |        |
| Shapiro-Wilk test                   |        |        |
| W                                   | 0.8037 | 0.9353 |
| P value                             | 0.0635 | 0.6219 |
| Passed normality test (alpha=0.05)? | Yes    | Yes    |
| P value summary                     | ns     | ns     |
| Number of values                    | 6      | 6      |

|                                            |                    |
|--------------------------------------------|--------------------|
| Table Analyzed                             | DCX PFC P21        |
| Column B                                   | PreVPA             |
| vs.                                        | vs.                |
| Column A                                   | Control            |
| Unpaired t test                            |                    |
| P value                                    | 0.0718             |
| P value summary                            | ns                 |
| Significantly different (P < 0.05)?        | No                 |
| One- or two-tailed P value?                | Two-tailed         |
| t, df                                      | t=2.013, df=10     |
| How big is the difference?                 |                    |
| Mean of column A                           | 17.81              |
| Mean of column B                           | 15.19              |
| Difference between means (B - A) $\pm$ SEM | -2.613 $\pm$ 1.298 |
| 95% confidence interval                    | -5.505 to 0.2791   |
| R squared (eta squared)                    | 0.2884             |
| F test to compare variances                |                    |
| F, DFn, Dfd                                | 2.318, 5, 5        |
| P value                                    | 0.3777             |
| P value summary                            | ns                 |
| Significantly different (P < 0.05)?        | No                 |
| Data analyzed                              |                    |
| Sample size, column A                      | 6                  |
| Sample size, column B                      | 6                  |

### Figure 2 E. NeuN

Test for normal distribution

Shapiro-Wilk test

|                                     |        |        |
|-------------------------------------|--------|--------|
| W                                   | 0.9770 | 0.8860 |
| P value                             | 0.9358 | 0.2975 |
| Passed normality test (alpha=0.05)? | Yes    | Yes    |
| P value summary                     | ns     | ns     |
| Number of values                    | 6      | 6      |

Table Analyzed

NeuN PFC P21

Column B

PreVPA

vs.

vs.

Column A

Control

Unpaired t test

P value

<0.0001

P value summary

\*\*\*\*

Significantly different (P < 0.05)?

Yes

One- or two-tailed P value?

Two-tailed

t, df

t=24.25, df=10

How big is the difference?

Mean of column A

25.36

Mean of column B

8.549

Difference between means (B - A)  $\pm$  SEM

-16.81  $\pm$  0.6932

95% confidence interval

-18.36 to -15.27

R squared (eta squared)

0.9833

F test to compare variances

F, DFn, Dfd

1.929, 5, 5

P value

0.4881

P value summary

ns

Significantly different (P < 0.05)?

No

Data analyzed

Sample size, column A

6

Sample size, column B

6

### Figure 2 E. Synaptophysin

Test for normal distribution

Shapiro-Wilk test

|                                     |        |        |
|-------------------------------------|--------|--------|
| W                                   | 0.9128 | 0.9068 |
| P value                             | 0.4550 | 0.4154 |
| Passed normality test (alpha=0.05)? | Yes    | Yes    |
| P value summary                     | ns     | ns     |
| Number of values                    | 6      | 6      |

Table Analyzed

SYP PFC P21

Column B

PreVPA

vs.

vs.

Column A

Control

Unpaired t test



|                                        |                  |
|----------------------------------------|------------------|
| P value                                | <0.0001          |
| P value summary                        | ****             |
| Significantly different (P < 0.05)?    | Yes              |
| One- or two-tailed P value?            | Two-tailed       |
| t, df                                  | t=12.40, df=10   |
| How big is the difference?             |                  |
| Mean of column A                       | 23.87            |
| Mean of column B                       | 9.679            |
| Difference between means (B - A) ± SEM | -14.19 ± 1.144   |
| 95% confidence interval                | -16.74 to -11.64 |
| R squared (eta squared)                | 0.9389           |
| F test to compare variances            |                  |
| F, DFn, Dfd                            | 1.696, 5, 5      |
| P value                                | 0.5761           |
| P value summary                        | ns               |
| Significantly different (P < 0.05)?    | No               |
| Data analyzed                          |                  |
| Sample size, column A                  | 6                |
| Sample size, column B                  | 6                |

## Figure 2 G. GFAP

|                                     |        |        |
|-------------------------------------|--------|--------|
| Test for normal distribution        |        |        |
| Shapiro-Wilk test                   |        |        |
| W                                   | 0.9655 | 0.9054 |
| P value                             | 0.8609 | 0.4067 |
| Passed normality test (alpha=0.05)? | Yes    | Yes    |
| P value summary                     | ns     | ns     |
| Number of values                    | 6      | 6      |

|                                        |                  |
|----------------------------------------|------------------|
| Table Analyzed                         | GFAP PFC Post21  |
| Column B                               | PostVPA          |
| vs.                                    | vs.              |
| Column A                               | Control          |
| Unpaired t test                        |                  |
| P value                                | <0.0001          |
| P value summary                        | ****             |
| Significantly different (P < 0.05)?    | Yes              |
| One- or two-tailed P value?            | Two-tailed       |
| t, df                                  | t=20.786, df=10  |
| How big is the difference?             |                  |
| Mean of column A                       | 10.530           |
| Mean of column B                       | 24.207           |
| Difference between means (B - A) ± SEM | 13.677 ± 0.65797 |
| 95% confidence interval                | 12.211 to 15.143 |
| R squared (eta squared)                | 0.97738          |
| F test to compare variances            |                  |
| F, DFn, Dfd                            | 4.5709, 5, 5     |
| P value                                | 0.1208           |
| P value summary                        | ns               |

|                                     |    |
|-------------------------------------|----|
| Significantly different (P < 0.05)? | No |
| Data analyzed                       |    |
| Sample size, column A               | 6  |
| Sample size, column B               | 6  |

### Figure 2 G. Doublecortin

|                                     |        |        |
|-------------------------------------|--------|--------|
| Test for normal distribution        |        |        |
| Shapiro-Wilk test                   |        |        |
| W                                   | 0.8394 | 0.9734 |
| P value                             | 0.1290 | 0.9146 |
| Passed normality test (alpha=0.05)? | Yes    | Yes    |
| P value summary                     | ns     | ns     |
| Number of values                    | 6      | 6      |

|                                            |                      |
|--------------------------------------------|----------------------|
| Table Analyzed                             | DCX PFC Post21       |
| Column B                                   | PostVPA              |
| vs.                                        | vs.                  |
| Column A                                   | Control              |
| Unpaired t test                            |                      |
| P value                                    | 0.8221               |
| P value summary                            | ns                   |
| Significantly different (P < 0.05)?        | No                   |
| One- or two-tailed P value?                | Two-tailed           |
| t, df                                      | t=0.2309, df=10      |
| How big is the difference?                 |                      |
| Mean of column A                           | 14.14                |
| Mean of column B                           | 13.97                |
| Difference between means (B - A) $\pm$ SEM | -0.1683 $\pm$ 0.7291 |
| 95% confidence interval                    | -1.793 to 1.456      |
| R squared (eta squared)                    | 0.005302             |
| F test to compare variances                |                      |
| F, DF <sub>n</sub> , Df <sub>d</sub>       | 1.842, 5, 5          |
| P value                                    | 0.5189               |
| P value summary                            | ns                   |
| Significantly different (P < 0.05)?        | No                   |
| Data analyzed                              |                      |
| Sample size, column A                      | 6                    |
| Sample size, column B                      | 6                    |

### Figure 2 G. NeuN

|                                     |        |        |
|-------------------------------------|--------|--------|
| Test for normal distribution        |        |        |
| Shapiro-Wilk test                   |        |        |
| W                                   | 0.8131 | 0.8539 |
| P value                             | 0.0768 | 0.1693 |
| Passed normality test (alpha=0.05)? | Yes    | Yes    |
| P value summary                     | ns     | ns     |
| Number of values                    | 6      | 6      |

|                                            |                    |
|--------------------------------------------|--------------------|
| Table Analyzed                             | NeuN PFC Post21    |
| Column B                                   | PostVPA            |
| vs.                                        | vs.                |
| Column A                                   | Control            |
| Unpaired t test                            |                    |
| P value                                    | 0.1125             |
| P value summary                            | ns                 |
| Significantly different (P < 0.05)?        | No                 |
| One- or two-tailed P value?                | Two-tailed         |
| t, df                                      | t=1.740, df=10     |
| How big is the difference?                 |                    |
| Mean of column A                           | 12.59              |
| Mean of column B                           | 13.96              |
| Difference between means (B - A) $\pm$ SEM | 1.375 $\pm$ 0.7903 |
| 95% confidence interval                    | -0.3859 to 3.136   |
| R squared (eta squared)                    | 0.2324             |
| F test to compare variances                |                    |
| F, DFn, Dfd                                | 3.347, 5, 5        |
| P value                                    | 0.2109             |
| P value summary                            | ns                 |
| Significantly different (P < 0.05)?        | No                 |
| Data analyzed                              |                    |
| Sample size, column A                      | 6                  |
| Sample size, column B                      | 6                  |

## Figure 2 G. Synaptophysin

|                                     |        |        |
|-------------------------------------|--------|--------|
| Test for normal distribution        |        |        |
| Shapiro-Wilk test                   |        |        |
| W                                   | 0.9217 | 0.9718 |
| P value                             | 0.5179 | 0.9044 |
| Passed normality test (alpha=0.05)? | Yes    | Yes    |
| P value summary                     | ns     | ns     |
| Number of values                    | 6      | 6      |

|                                            |                    |
|--------------------------------------------|--------------------|
| Table Analyzed                             | SYP PFC Post21     |
| Column B                                   | PostVPA            |
| vs.                                        | vs.                |
| Column A                                   | Control            |
| Unpaired t test                            |                    |
| P value                                    | <0.0001            |
| P value summary                            | ****               |
| Significantly different (P < 0.05)?        | Yes                |
| One- or two-tailed P value?                | Two-tailed         |
| t, df                                      | t=8.207, df=10     |
| How big is the difference?                 |                    |
| Mean of column A                           | 20.81              |
| Mean of column B                           | 10.82              |
| Difference between means (B - A) $\pm$ SEM | -9.988 $\pm$ 1.217 |
| 95% confidence interval                    | -12.70 to -7.277   |

|                                     |             |
|-------------------------------------|-------------|
| R squared (eta squared)             | 0.8707      |
| F test to compare variances         |             |
| F, DFn, Dfd                         | 1.299, 5, 5 |
| P value                             | 0.7808      |
| P value summary                     | ns          |
| Significantly different (P < 0.05)? | No          |
| Data analyzed                       |             |
| Sample size, column A               | 6           |
| Sample size, column B               | 6           |

### Figure 3 A. GFAP

Test for normal distribution

Shapiro-Wilk test

|                                     |        |        |
|-------------------------------------|--------|--------|
| W                                   | 0.9935 | 0.9357 |
| P value                             | 0.9960 | 0.6249 |
| Passed normality test (alpha=0.05)? | Yes    | Yes    |
| P value summary                     | ns     | ns     |
| Number of values                    | 6      | 6      |

Table Analyzed

Column B

vs.

Column A

Unpaired t test

P value

P value summary

Significantly different (P < 0.05)?

One- or two-tailed P value?

t, df

How big is the difference?

Mean of column A

Mean of column B

Difference between means (B - A)  $\pm$  SEM

95% confidence interval

R squared (eta squared)

F test to compare variances

F, DFn, Dfd

P value

P value summary

Significantly different (P < 0.05)?

Data analyzed

Sample size, column A

Sample size, column B

GFAP HIP P14

PreVPA

vs.

Control

0.0867

ns

No

Two-tailed

t=1.899, df=10

26.19

24.73

-1.462  $\pm$  0.7695

-3.176 to 0.2531

0.2651

2.159, 5, 5

0.4181

ns

No

6

6

### Figure 3 A. Doublecortin

Test for normal distribution

Shapiro-Wilk test

|   |        |        |
|---|--------|--------|
| W | 0.9442 | 0.9629 |
|---|--------|--------|

|                                            |                     |        |
|--------------------------------------------|---------------------|--------|
| P value                                    | 0.6934              | 0.8421 |
| Passed normality test (alpha=0.05)?        | Yes                 | Yes    |
| P value summary                            | ns                  | ns     |
| Number of values                           | 6                   | 6      |
| Table Analyzed                             | DCX HIP P14         |        |
| Column B                                   | PreVPA              |        |
| vs.                                        | vs.                 |        |
| Column A                                   | Control             |        |
| Unpaired t test                            |                     |        |
| P value                                    | 0.0597              |        |
| P value summary                            | ns                  |        |
| Significantly different (P < 0.05)?        | No                  |        |
| One- or two-tailed P value?                | Two-tailed          |        |
| t, df                                      | t=2.123, df=10      |        |
| How big is the difference?                 |                     |        |
| Mean of column A                           | 17.17               |        |
| Mean of column B                           | 15.84               |        |
| Difference between means (B - A) $\pm$ SEM | -1.333 $\pm$ 0.6280 |        |
| 95% confidence interval                    | -2.732 to 0.06608   |        |
| R squared (eta squared)                    | 0.3107              |        |
| F test to compare variances                |                     |        |
| F, DFn, Dfd                                | 1.481, 5, 5         |        |
| P value                                    | 0.6768              |        |
| P value summary                            | ns                  |        |
| Significantly different (P < 0.05)?        | No                  |        |
| Data analyzed                              |                     |        |
| Sample size, column A                      | 6                   |        |
| Sample size, column B                      | 6                   |        |

### Figure 3 A. NeuN

|                                     |                 |        |
|-------------------------------------|-----------------|--------|
| Test for normal distribution        |                 |        |
| Shapiro-Wilk test                   |                 |        |
| W                                   | 0.9115          | 0.9811 |
| P value                             | 0.4464          | 0.9569 |
| Passed normality test (alpha=0.05)? | Yes             | Yes    |
| P value summary                     | ns              | ns     |
| Number of values                    | 6               | 6      |
| Table Analyzed                      | NeuN HIP P14    |        |
| Column B                            | PreVPA          |        |
| vs.                                 | vs.             |        |
| Column A                            | Control         |        |
| Unpaired t test                     |                 |        |
| P value                             | 0.8093          |        |
| P value summary                     | ns              |        |
| Significantly different (P < 0.05)? | No              |        |
| One- or two-tailed P value?         | Two-tailed      |        |
| t, df                               | t=0.2478, df=10 |        |

|                                            |                      |
|--------------------------------------------|----------------------|
| How big is the difference?                 |                      |
| Mean of column A                           | 14.95                |
| Mean of column B                           | 14.81                |
| Difference between means (B - A) $\pm$ SEM | -0.1477 $\pm$ 0.5958 |
| 95% confidence interval                    | -1.475 to 1.180      |
| R squared (eta squared)                    | 0.006105             |
| F test to compare variances                |                      |
| F, DFn, Dfd                                | 1.193, 5, 5          |
| P value                                    | 0.8513               |
| P value summary                            | ns                   |
| Significantly different (P < 0.05)?        | No                   |
| Data analyzed                              |                      |
| Sample size, column A                      | 6                    |
| Sample size, column B                      | 6                    |

### Figure 3 A. Synaptophysin

|                                     |        |        |
|-------------------------------------|--------|--------|
| Test for normal distribution        |        |        |
| Shapiro-Wilk test                   |        |        |
| W                                   | 0.9588 | 0.9648 |
| P value                             | 0.8108 | 0.8559 |
| Passed normality test (alpha=0.05)? | Yes    | Yes    |
| P value summary                     | ns     | ns     |
| Number of values                    | 6      | 6      |

|                                            |                      |
|--------------------------------------------|----------------------|
| Table Analyzed                             | SYP HIP P14          |
| Column B                                   | PreVPA               |
| vs.                                        | vs.                  |
| Column A                                   | Control              |
| Unpaired t test                            |                      |
| P value                                    | 0.0564               |
| P value summary                            | ns                   |
| Significantly different (P < 0.05)?        | No                   |
| One- or two-tailed P value?                | Two-tailed           |
| t, df                                      | t=2.157, df=10       |
| How big is the difference?                 |                      |
| Mean of column A                           | 16.65                |
| Mean of column B                           | 15.74                |
| Difference between means (B - A) $\pm$ SEM | -0.9098 $\pm$ 0.4218 |
| 95% confidence interval                    | -1.850 to 0.03006    |
| R squared (eta squared)                    | 0.3175               |
| F test to compare variances                |                      |
| F, DFn, Dfd                                | 1.368, 5, 5          |
| P value                                    | 0.7393               |
| P value summary                            | ns                   |
| Significantly different (P < 0.05)?        | No                   |
| Data analyzed                              |                      |
| Sample size, column A                      | 6                    |
| Sample size, column B                      | 6                    |

### Figure 3 C. GFAP

Test for normal distribution

Shapiro-Wilk test

|                                     |        |        |
|-------------------------------------|--------|--------|
| W                                   | 0.8292 | 0.9429 |
| P value                             | 0.1058 | 0.6828 |
| Passed normality test (alpha=0.05)? | Yes    | Yes    |
| P value summary                     | ns     | ns     |
| Number of values                    | 6      | 6      |

Table Analyzed

GFAP HIP Post14

Column B

PostVPA

vs.

vs.

Column A

Control

Unpaired t test

P value

0.0023

P value summary

\*\*

Significantly different (P < 0.05)?

Yes

One- or two-tailed P value?

Two-tailed

t, df

t=4.050, df=10

How big is the difference?

Mean of column A

16.36

Mean of column B

19.94

Difference between means (B - A)  $\pm$  SEM

3.587  $\pm$  0.8855

95% confidence interval

1.614 to 5.560

R squared (eta squared)

0.6213

F test to compare variances

F, DFn, Dfd

1.168, 5, 5

P value

0.8689

P value summary

ns

Significantly different (P < 0.05)?

No

Data analyzed

Sample size, column A

6

Sample size, column B

6

### Figure 3 C. Doublecortin

Test for normal distribution

Shapiro-Wilk test

|                                     |        |        |
|-------------------------------------|--------|--------|
| W                                   | 0.9328 | 0.9310 |
| P value                             | 0.6016 | 0.5875 |
| Passed normality test (alpha=0.05)? | Yes    | Yes    |
| P value summary                     | ns     | ns     |
| Number of values                    | 6      | 6      |

Table Analyzed

DCX HIP Post14

Column B

PostVPA

vs.

vs.

Column A

Control

Unpaired t test

|                                        |                   |
|----------------------------------------|-------------------|
| P value                                | 0.9739            |
| P value summary                        | ns                |
| Significantly different (P < 0.05)?    | No                |
| One- or two-tailed P value?            | Two-tailed        |
| t, df                                  | t=0.03356, df=10  |
| How big is the difference?             |                   |
| Mean of column A                       | 22.08             |
| Mean of column B                       | 22.05             |
| Difference between means (B - A) ± SEM | -0.03333 ± 0.9932 |
| 95% confidence interval                | -2.246 to 2.180   |
| R squared (eta squared)                | 0.0001126         |
| F test to compare variances            |                   |
| F, DFn, Dfd                            | 1.684, 5, 5       |
| P value                                | 0.5813            |
| P value summary                        | ns                |
| Significantly different (P < 0.05)?    | No                |
| Data analyzed                          |                   |
| Sample size, column A                  | 6                 |
| Sample size, column B                  | 6                 |

### Figure 3 C. NeuN

Test for normal distribution

Shapiro-Wilk test

|                                     |        |        |
|-------------------------------------|--------|--------|
| W                                   | 0.9192 | 0.8942 |
| P value                             | 0.4998 | 0.3405 |
| Passed normality test (alpha=0.05)? | Yes    | Yes    |
| P value summary                     | ns     | ns     |
| Number of values                    | 6      | 6      |

Table Analyzed

Column B

vs.

Column A

Unpaired t test

P value

P value summary

Significantly different (P < 0.05)?

One- or two-tailed P value?

t, df

How big is the difference?

Mean of column A

Mean of column B

Difference between means (B - A) ± SEM

95% confidence interval

R squared (eta squared)

F test to compare variances

F, DFn, Dfd

P value

P value summary

NeuN HIP Post14

PostVPA

vs.

Control

<0.0001

\*\*\*\*

Yes

Two-tailed

t=10.95, df=10

7.686

15.14

7.455 ± 0.6808

5.938 to 8.972

0.9230

1.201, 5, 5

0.8457

ns



|                                         |    |
|-----------------------------------------|----|
| Significantly different ( $P < 0.05$ )? | No |
| Data analyzed                           |    |
| Sample size, column A                   | 6  |
| Sample size, column B                   | 6  |

### Figure 3 C. Synaptophysin

|                                          |        |        |
|------------------------------------------|--------|--------|
| Test for normal distribution             |        |        |
| Shapiro-Wilk test                        |        |        |
| W                                        | 0.9406 | 0.9031 |
| P value                                  | 0.6637 | 0.3929 |
| Passed normality test ( $\alpha=0.05$ )? | Yes    | Yes    |
| P value summary                          | ns     | ns     |
| Number of values                         | 6      | 6      |

|                                                |                      |
|------------------------------------------------|----------------------|
| Table Analyzed                                 | SYP HIP Post14       |
| Column B                                       | PostVPA              |
| vs.                                            | vs.                  |
| Column A                                       | Control              |
| Unpaired t test                                |                      |
| P value                                        | 0.6790               |
| P value summary                                | ns                   |
| Significantly different ( $P < 0.05$ )?        | No                   |
| One- or two-tailed P value?                    | Two-tailed           |
| t, df                                          | $t=0.4262$ , $df=10$ |
| How big is the difference?                     |                      |
| Mean of column A                               | 17.31                |
| Mean of column B                               | 17.00                |
| Difference between means ( $B - A$ ) $\pm$ SEM | $-0.3033 \pm 0.7117$ |
| 95% confidence interval                        | -1.889 to 1.282      |
| R squared (eta squared)                        | 0.01784              |
| F test to compare variances                    |                      |
| F, DFn, Dfd                                    | 2.100, 5, 5          |
| P value                                        | 0.4349               |
| P value summary                                | ns                   |
| Significantly different ( $P < 0.05$ )?        | No                   |
| Data analyzed                                  |                      |
| Sample size, column A                          | 6                    |
| Sample size, column B                          | 6                    |

### Figure 3 E. GFAP

|                                          |        |        |
|------------------------------------------|--------|--------|
| Test for normal distribution             |        |        |
| Shapiro-Wilk test                        |        |        |
| W                                        | 0.9511 | 0.8569 |
| P value                                  | 0.7494 | 0.1788 |
| Passed normality test ( $\alpha=0.05$ )? | Yes    | Yes    |
| P value summary                          | ns     | ns     |
| Number of values                         | 6      | 6      |

|                                            |                     |
|--------------------------------------------|---------------------|
| Table Analyzed                             | GFAP HIP P21        |
| Column B                                   | PreVPA              |
| vs.                                        | vs.                 |
| Column A                                   | Control             |
| Unpaired t test                            |                     |
| P value                                    | 0.0029              |
| P value summary                            | **                  |
| Significantly different (P < 0.05)?        | Yes                 |
| One- or two-tailed P value?                | Two-tailed          |
| t, df                                      | t=3.913, df=10      |
| How big is the difference?                 |                     |
| Mean of column A                           | 17.89               |
| Mean of column B                           | 15.43               |
| Difference between means (B - A) $\pm$ SEM | -2.461 $\pm$ 0.6290 |
| 95% confidence interval                    | -3.863 to -1.060    |
| R squared (eta squared)                    | 0.6049              |
| F test to compare variances                |                     |
| F, DFn, Dfd                                | 1.030, 5, 5         |
| P value                                    | 0.9753              |
| P value summary                            | ns                  |
| Significantly different (P < 0.05)?        | No                  |
| Data analyzed                              |                     |
| Sample size, column A                      | 6                   |
| Sample size, column B                      | 6                   |

### Figure 3 E. Doublecortin

|                                     |        |        |
|-------------------------------------|--------|--------|
| Test for normal distribution        |        |        |
| Shapiro-Wilk test                   |        |        |
| W                                   | 0.8722 | 0.9412 |
| P value                             | 0.2352 | 0.6688 |
| Passed normality test (alpha=0.05)? | Yes    | Yes    |
| P value summary                     | ns     | ns     |
| Number of values                    | 6      | 6      |

|                                            |                     |
|--------------------------------------------|---------------------|
| Table Analyzed                             | DCX HIP P21         |
| Column B                                   | PreVPA              |
| vs.                                        | vs.                 |
| Column A                                   | Control             |
| Unpaired t test                            |                     |
| P value                                    | 0.0003              |
| P value summary                            | ***                 |
| Significantly different (P < 0.05)?        | Yes                 |
| One- or two-tailed P value?                | Two-tailed          |
| t, df                                      | t=5.482, df=10      |
| How big is the difference?                 |                     |
| Mean of column A                           | 18.43               |
| Mean of column B                           | 13.75               |
| Difference between means (B - A) $\pm$ SEM | -4.682 $\pm$ 0.8542 |
| 95% confidence interval                    | -6.586 to -2.779    |

|                                     |             |
|-------------------------------------|-------------|
| R squared (eta squared)             | 0.7503      |
| F test to compare variances         |             |
| F, DFn, Dfd                         | 3.132, 5, 5 |
| P value                             | 0.2359      |
| P value summary                     | ns          |
| Significantly different (P < 0.05)? | No          |
| Data analyzed                       |             |
| Sample size, column A               | 6           |
| Sample size, column B               | 6           |

### Figure 3 E. NeuN

|                                     |        |        |
|-------------------------------------|--------|--------|
| Test for normal distribution        |        |        |
| Shapiro-Wilk test                   |        |        |
| W                                   | 0.8745 | 0.9477 |
| P value                             | 0.2447 | 0.7220 |
| Passed normality test (alpha=0.05)? | Yes    | Yes    |
| P value summary                     | ns     | ns     |
| Number of values                    | 6      | 6      |

|                                            |                    |
|--------------------------------------------|--------------------|
| Table Analyzed                             | NeuN HIP Pre21     |
| Column B                                   | PreVPA             |
| vs.                                        | vs.                |
| Column A                                   | Control            |
| Unpaired t test                            |                    |
| P value                                    | 0.0028             |
| P value summary                            | **                 |
| Significantly different (P < 0.05)?        | Yes                |
| One- or two-tailed P value?                | Two-tailed         |
| t, df                                      | t=3.935, df=10     |
| How big is the difference?                 |                    |
| Mean of column A                           | 11.76              |
| Mean of column B                           | 15.22              |
| Difference between means (B - A) $\pm$ SEM | 3.460 $\pm$ 0.8794 |
| 95% confidence interval                    | 1.501 to 5.419     |
| R squared (eta squared)                    | 0.6075             |
| F test to compare variances                |                    |
| F, DFn, Dfd                                | 1.564, 5, 5        |
| P value                                    | 0.6356             |
| P value summary                            | ns                 |
| Significantly different (P < 0.05)?        | No                 |
| Data analyzed                              |                    |
| Sample size, column A                      | 6                  |
| Sample size, column B                      | 6                  |

### Figure 3 E. Synaptophysin

|                              |        |        |
|------------------------------|--------|--------|
| Test for normal distribution |        |        |
| Shapiro-Wilk test            |        |        |
| W                            | 0.9031 | 0.9174 |

|                                     |        |        |
|-------------------------------------|--------|--------|
| P value                             | 0.3926 | 0.4870 |
| Passed normality test (alpha=0.05)? | Yes    | Yes    |
| P value summary                     | ns     | ns     |
| Number of values                    | 6      | 6      |

|                                            |                    |
|--------------------------------------------|--------------------|
| Table Analyzed                             | SYP HIP P21        |
| Column B                                   | PreVPA             |
| vs.                                        | vs.                |
| Column A                                   | Control            |
| Unpaired t test                            |                    |
| P value                                    | <0.0001            |
| P value summary                            | ****               |
| Significantly different (P < 0.05)?        | Yes                |
| One- or two-tailed P value?                | Two-tailed         |
| t, df                                      | t=15.48, df=10     |
| How big is the difference?                 |                    |
| Mean of column A                           | 8.272              |
| Mean of column B                           | 18.04              |
| Difference between means (B - A) $\pm$ SEM | 9.768 $\pm$ 0.6310 |
| 95% confidence interval                    | 8.362 to 11.17     |
| R squared (eta squared)                    | 0.9599             |
| F test to compare variances                |                    |
| F, DFn, Dfd                                | 1.397, 5, 5        |
| P value                                    | 0.7228             |
| P value summary                            | ns                 |
| Significantly different (P < 0.05)?        | No                 |
| Data analyzed                              |                    |
| Sample size, column A                      | 6                  |
| Sample size, column B                      | 6                  |

### Figure 3 G. GFAP

|                                     |        |        |
|-------------------------------------|--------|--------|
| Test for normal distribution        |        |        |
| Shapiro-Wilk test                   |        |        |
| W                                   | 0.9578 | 0.9288 |
| P value                             | 0.8026 | 0.5709 |
| Passed normality test (alpha=0.05)? | Yes    | Yes    |
| P value summary                     | ns     | ns     |
| Number of values                    | 6      | 6      |

|                                     |                 |
|-------------------------------------|-----------------|
| Table Analyzed                      | GFAP HIP Post21 |
| Column B                            | PostVPA         |
| vs.                                 | vs.             |
| Column A                            | Control         |
| Unpaired t test                     |                 |
| P value                             | <0.0001         |
| P value summary                     | ****            |
| Significantly different (P < 0.05)? | Yes             |
| One- or two-tailed P value?         | Two-tailed      |
| t, df                               | t=8.169, df=10  |

|                                            |                     |
|--------------------------------------------|---------------------|
| How big is the difference?                 |                     |
| Mean of column A                           | 27.52               |
| Mean of column B                           | 19.97               |
| Difference between means (B - A) $\pm$ SEM | -7.545 $\pm$ 0.9236 |
| 95% confidence interval                    | -9.603 to -5.487    |
| R squared (eta squared)                    | 0.8697              |
| F test to compare variances                |                     |
| F, DFn, Dfd                                | 1.944, 5, 5         |
| P value                                    | 0.4832              |
| P value summary                            | ns                  |
| Significantly different (P < 0.05)?        | No                  |
| Data analyzed                              |                     |
| Sample size, column A                      | 6                   |
| Sample size, column B                      | 6                   |

### Figure 3 G. Doublecortin

|                                     |        |        |
|-------------------------------------|--------|--------|
| Test for normal distribution        |        |        |
| Shapiro-Wilk test                   |        |        |
| W                                   | 0.8493 | 0.9561 |
| P value                             | 0.1554 | 0.7889 |
| Passed normality test (alpha=0.05)? | Yes    | Yes    |
| P value summary                     | ns     | ns     |
| Number of values                    | 6      | 6      |

|                                            |                    |
|--------------------------------------------|--------------------|
| Table Analyzed                             | DCX HIP Post21     |
| Column B                                   | PostVPA            |
| vs.                                        | vs.                |
| Column A                                   | Control            |
| Unpaired t test                            |                    |
| P value                                    | 0.0003             |
| P value summary                            | ***                |
| Significantly different (P < 0.05)?        | Yes                |
| One- or two-tailed P value?                | Two-tailed         |
| t, df                                      | t=5.438, df=10     |
| How big is the difference?                 |                    |
| Mean of column A                           | 19.32              |
| Mean of column B                           | 13.80              |
| Difference between means (B - A) $\pm$ SEM | -5.517 $\pm$ 1.014 |
| 95% confidence interval                    | -7.777 to -3.256   |
| R squared (eta squared)                    | 0.7473             |
| F test to compare variances                |                    |
| F, DFn, Dfd                                | 2.549, 5, 5        |
| P value                                    | 0.3276             |
| P value summary                            | ns                 |
| Significantly different (P < 0.05)?        | No                 |
| Data analyzed                              |                    |
| Sample size, column A                      | 6                  |
| Sample size, column B                      | 6                  |

### Figure 3 G. NeuN

Test for normal distribution

Shapiro-Wilk test

|                                     |        |        |
|-------------------------------------|--------|--------|
| W                                   | 0.9687 | 0.8469 |
| P value                             | 0.8838 | 0.1486 |
| Passed normality test (alpha=0.05)? | Yes    | Yes    |
| P value summary                     | ns     | ns     |
| Number of values                    | 6      | 6      |

Table Analyzed

NeuN HIP Post21

Column B

PostVPA

vs.

vs.

Column A

Control

Unpaired t test

P value

0.3401

P value summary

ns

Significantly different (P < 0.05)?

No

One- or two-tailed P value?

Two-tailed

t, df

t=1.002, df=10

How big is the difference?

Mean of column A

13.05

Mean of column B

13.58

Difference between means (B - A)  $\pm$  SEM

0.5367  $\pm$  0.5358

95% confidence interval

-0.6571 to 1.730

R squared (eta squared)

0.09119

F test to compare variances

F, DFn, Dfd

1.024, 5, 5

P value

0.9798

P value summary

ns

Significantly different (P < 0.05)?

No

Data analyzed

Sample size, column A

6

Sample size, column B

6

### Figure 3 G. Synaptophysin

Test for normal distribution

Shapiro-Wilk test

|                                     |        |        |
|-------------------------------------|--------|--------|
| W                                   | 0.9394 | 0.8784 |
| P value                             | 0.6542 | 0.2616 |
| Passed normality test (alpha=0.05)? | Yes    | Yes    |
| P value summary                     | ns     | ns     |
| Number of values                    | 6      | 6      |

Table Analyzed

SYP HIP Post21

Column B

Data Set-B

vs.

vs.

Column A

Data Set-A

Unpaired t test

|                                        |                |
|----------------------------------------|----------------|
| P value                                | <0.0001        |
| P value summary                        | ****           |
| Significantly different (P < 0.05)?    | Yes            |
| One- or two-tailed P value?            | Two-tailed     |
| t, df                                  | t=7.352, df=10 |
| How big is the difference?             |                |
| Mean of column A                       | 12.64          |
| Mean of column B                       | 20.67          |
| Difference between means (B - A) ± SEM | 8.025 ± 1.091  |
| 95% confidence interval                | 5.593 to 10.46 |
| R squared (eta squared)                | 0.8439         |
| F test to compare variances            |                |
| F, DFn, Dfd                            | 1.999, 5, 5    |
| P value                                | 0.4654         |
| P value summary                        | ns             |
| Significantly different (P < 0.05)?    | No             |
| Data analyzed                          |                |
| Sample size, column A                  | 6              |
| Sample size, column B                  | 6              |

#### Figure 4 A. GFAP

Test for normal distribution

Shapiro-Wilk test

|                                     |        |        |
|-------------------------------------|--------|--------|
| W                                   | 0.9672 | 0.9725 |
| P value                             | 0.8728 | 0.9085 |
| Passed normality test (alpha=0.05)? | Yes    | Yes    |
| P value summary                     | ns     | ns     |
| Number of values                    | 6      | 6      |

Table Analyzed

Column B

vs.

Column A

Unpaired t test

|         |         |
|---------|---------|
| P value | <0.0001 |
|---------|---------|

|                 |      |
|-----------------|------|
| P value summary | **** |
|-----------------|------|

|                                     |     |
|-------------------------------------|-----|
| Significantly different (P < 0.05)? | Yes |
|-------------------------------------|-----|

|                             |            |
|-----------------------------|------------|
| One- or two-tailed P value? | Two-tailed |
|-----------------------------|------------|

|       |                |
|-------|----------------|
| t, df | t=12.32, df=10 |
|-------|----------------|

How big is the difference?

|                  |       |
|------------------|-------|
| Mean of column A | 7.694 |
|------------------|-------|

|                  |       |
|------------------|-------|
| Mean of column B | 20.01 |
|------------------|-------|

|                                        |                |
|----------------------------------------|----------------|
| Difference between means (B - A) ± SEM | 12.31 ± 0.9991 |
|----------------------------------------|----------------|

|                         |                |
|-------------------------|----------------|
| 95% confidence interval | 10.09 to 14.54 |
|-------------------------|----------------|

|                         |        |
|-------------------------|--------|
| R squared (eta squared) | 0.9382 |
|-------------------------|--------|

F test to compare variances

|             |             |
|-------------|-------------|
| F, DFn, Dfd | 5.253, 5, 5 |
|-------------|-------------|

|         |        |
|---------|--------|
| P value | 0.0927 |
|---------|--------|

|                 |    |
|-----------------|----|
| P value summary | ns |
|-----------------|----|

|                                         |    |
|-----------------------------------------|----|
| Significantly different ( $P < 0.05$ )? | No |
| Data analyzed                           |    |
| Sample size, column A                   | 6  |
| Sample size, column B                   | 6  |

#### Figure 4 A. Doublecortin

|                                          |        |        |
|------------------------------------------|--------|--------|
| Test for normal distribution             |        |        |
| Shapiro-Wilk test                        |        |        |
| W                                        | 0.9505 | 0.7983 |
| P value                                  | 0.7443 | 0.0567 |
| Passed normality test ( $\alpha=0.05$ )? | Yes    | Yes    |
| P value summary                          | ns     | ns     |
| Number of values                         | 6      | 6      |

|                                                |                     |
|------------------------------------------------|---------------------|
| Table Analyzed                                 | DCX BO P14          |
| Column B                                       | PreVPA              |
| vs.                                            | vs.                 |
| Column A                                       | Control             |
| Unpaired t test                                |                     |
| P value                                        | 0.1657              |
| P value summary                                | ns                  |
| Significantly different ( $P < 0.05$ )?        | No                  |
| One- or two-tailed P value?                    | Two-tailed          |
| t, df                                          | $t=1.495$ , $df=10$ |
| How big is the difference?                     |                     |
| Mean of column A                               | 10.78               |
| Mean of column B                               | 12.00               |
| Difference between means ( $B - A$ ) $\pm$ SEM | $1.220 \pm 0.8159$  |
| 95% confidence interval                        | -0.5979 to 3.038    |
| R squared (eta squared)                        | 0.1827              |
| F test to compare variances                    |                     |
| F, DFn, Dfd                                    | 2.444, 5, 5         |
| P value                                        | 0.3490              |
| P value summary                                | ns                  |
| Significantly different ( $P < 0.05$ )?        | No                  |
| Data analyzed                                  |                     |
| Sample size, column A                          | 6                   |
| Sample size, column B                          | 6                   |

#### Figure 4 A. NeuN

|                                          |        |        |
|------------------------------------------|--------|--------|
| Test for normal distribution             |        |        |
| Shapiro-Wilk test                        |        |        |
| W                                        | 0.8189 | 0.8753 |
| P value                                  | 0.0864 | 0.2481 |
| Passed normality test ( $\alpha=0.05$ )? | Yes    | Yes    |
| P value summary                          | ns     | ns     |
| Number of values                         | 6      | 6      |



|                                            |                      |
|--------------------------------------------|----------------------|
| Table Analyzed                             | NeuN BO P14          |
| Column B                                   | PreVPA               |
| vs.                                        | vs.                  |
| Column A                                   | Control              |
| Unpaired t test                            |                      |
| P value                                    | 0.3929               |
| P value summary                            | ns                   |
| Significantly different (P < 0.05)?        | No                   |
| One- or two-tailed P value?                | Two-tailed           |
| t, df                                      | t=0.8928, df=10      |
| How big is the difference?                 |                      |
| Mean of column A                           | 16.04                |
| Mean of column B                           | 15.33                |
| Difference between means (B - A) $\pm$ SEM | -0.7133 $\pm$ 0.7990 |
| 95% confidence interval                    | -2.494 to 1.067      |
| R squared (eta squared)                    | 0.07383              |
| F test to compare variances                |                      |
| F, DFn, Dfd                                | 1.582, 5, 5          |
| P value                                    | 0.6268               |
| P value summary                            | ns                   |
| Significantly different (P < 0.05)?        | No                   |
| Data analyzed                              |                      |
| Sample size, column A                      | 6                    |
| Sample size, column B                      | 6                    |

#### Figure 4 C. GFAP

|                                     |        |        |
|-------------------------------------|--------|--------|
| Test for normal distribution        |        |        |
| Shapiro-Wilk test                   |        |        |
| W                                   | 0.9109 | 0.9845 |
| P value                             | 0.4423 | 0.9717 |
| Passed normality test (alpha=0.05)? | Yes    | Yes    |
| P value summary                     | ns     | ns     |
| Number of values                    | 6      | 6      |

|                                            |                    |
|--------------------------------------------|--------------------|
| Table Analyzed                             | GFAP BO Post14     |
| Column B                                   | PostVPA            |
| vs.                                        | vs.                |
| Column A                                   | Control            |
| Unpaired t test                            |                    |
| P value                                    | <0.0001            |
| P value summary                            | ****               |
| Significantly different (P < 0.05)?        | Yes                |
| One- or two-tailed P value?                | Two-tailed         |
| t, df                                      | t=19.80, df=10     |
| How big is the difference?                 |                    |
| Mean of column A                           | 9.540              |
| Mean of column B                           | 19.99              |
| Difference between means (B - A) $\pm$ SEM | 10.45 $\pm$ 0.5278 |
| 95% confidence interval                    | 9.276 to 11.63     |

|                                     |             |
|-------------------------------------|-------------|
| R squared (eta squared)             | 0.9751      |
| F test to compare variances         |             |
| F, DFn, Dfd                         | 1.630, 5, 5 |
| P value                             | 0.6050      |
| P value summary                     | ns          |
| Significantly different (P < 0.05)? | No          |
| Data analyzed                       |             |
| Sample size, column A               | 6           |
| Sample size, column B               | 6           |

#### Figure 4 C. Doublecortin

Test for normal distribution

Shapiro-Wilk test

|                                     |        |        |
|-------------------------------------|--------|--------|
| W                                   | 0.9249 | 0.8359 |
| P value                             | 0.5413 | 0.1204 |
| Passed normality test (alpha=0.05)? | Yes    | Yes    |
| P value summary                     | ns     | ns     |
| Number of values                    | 6      | 6      |

Table Analyzed

Column B

vs.

Column A

Unpaired t test

P value

P value summary

Significantly different (P < 0.05)?

One- or two-tailed P value?

t, df

How big is the difference?

Mean of column A

Mean of column B

Difference between means (B - A)  $\pm$  SEM

95% confidence interval

R squared (eta squared)

F test to compare variances

F, DFn, Dfd

P value

P value summary

Significantly different (P < 0.05)?

Data analyzed

Sample size, column A

Sample size, column B

DCX BO Post14

PostVPA

vs.

Control

0.6693

ns

No

Two-tailed

t=0.4400, df=10

16.30

15.88

-0.4190  $\pm$  0.9523

-2.541 to 1.703

0.01899

3.168, 5, 5

0.2314

ns

No

6

6

#### Figure 4 C. NeuN

Test for normal distribution

Shapiro-Wilk test

|   |        |        |
|---|--------|--------|
| W | 0.8761 | 0.9661 |
|---|--------|--------|

|                                     |        |        |
|-------------------------------------|--------|--------|
| P value                             | 0.2514 | 0.8650 |
| Passed normality test (alpha=0.05)? | Yes    | Yes    |
| P value summary                     | ns     | ns     |
| Number of values                    | 6      | 6      |

|                                            |                      |
|--------------------------------------------|----------------------|
| Table Analyzed                             | NeuN BO Post14       |
| Column B                                   | PostVPA              |
| vs.                                        | vs.                  |
| Column A                                   | Control              |
| Unpaired t test                            |                      |
| P value                                    | 0.5188               |
| P value summary                            | ns                   |
| Significantly different (P < 0.05)?        | No                   |
| One- or two-tailed P value?                | Two-tailed           |
| t, df                                      | t=0.6688, df=10      |
| How big is the difference?                 |                      |
| Mean of column A                           | 10.20                |
| Mean of column B                           | 9.642                |
| Difference between means (B - A) $\pm$ SEM | -0.5533 $\pm$ 0.8274 |
| 95% confidence interval                    | -2.397 to 1.290      |
| R squared (eta squared)                    | 0.04281              |
| F test to compare variances                |                      |
| F, DF <sub>n</sub> , Df <sub>d</sub>       | 2.223, 5, 5          |
| P value                                    | 0.4013               |
| P value summary                            | ns                   |
| Significantly different (P < 0.05)?        | No                   |
| Data analyzed                              |                      |
| Sample size, column A                      | 6                    |
| Sample size, column B                      | 6                    |

#### Figure 4 E. GFAP

|                                     |        |        |
|-------------------------------------|--------|--------|
| Test for normal distribution        |        |        |
| Shapiro-Wilk test                   |        |        |
| W                                   | 0.8925 | 0.8499 |
| P value                             | 0.3315 | 0.1571 |
| Passed normality test (alpha=0.05)? | Yes    | Yes    |
| P value summary                     | ns     | ns     |
| Number of values                    | 6      | 6      |

|                                     |             |
|-------------------------------------|-------------|
| Table Analyzed                      | GFAP BO P21 |
| Column B                            | Data Set-B  |
| vs.                                 | vs.         |
| Column A                            | Data Set-A  |
| Unpaired t test                     |             |
| P value                             | 0.9911      |
| P value summary                     | ns          |
| Significantly different (P < 0.05)? | No          |
| One- or two-tailed P value?         | Two-tailed  |

|                                            |                        |
|--------------------------------------------|------------------------|
| t, df                                      | t=0.01145, df=10       |
| How big is the difference?                 |                        |
| Mean of column A                           | 15.59                  |
| Mean of column B                           | 15.59                  |
| Difference between means (B - A) $\pm$ SEM | -0.007667 $\pm$ 0.6694 |
| 95% confidence interval                    | -1.499 to 1.484        |
| R squared (eta squared)                    | 1.312e-005             |
| F test to compare variances                |                        |
| F, DFn, Dfd                                | 1.348, 5, 5            |
| P value                                    | 0.7510                 |
| P value summary                            | ns                     |
| Significantly different (P < 0.05)?        | No                     |
| Data analyzed                              |                        |
| Sample size, column A                      | 6                      |
| Sample size, column B                      | 6                      |

#### Figure 4 E. Doublecortin

Test for normal distribution

Shapiro-Wilk test

|                                     |        |        |
|-------------------------------------|--------|--------|
| W                                   | 0.9074 | 0.9516 |
| P value                             | 0.4197 | 0.7529 |
| Passed normality test (alpha=0.05)? | Yes    | Yes    |
| P value summary                     | ns     | ns     |
| Number of values                    | 6      | 6      |

Table Analyzed

Column B

vs.

Column A

Unpaired t test

P value

P value summary

Significantly different (P < 0.05)?

One- or two-tailed P value?

t, df

How big is the difference?

Mean of column A

Mean of column B

Difference between means (B - A)  $\pm$  SEM

95% confidence interval

R squared (eta squared)

F test to compare variances

F, DFn, Dfd

P value

P value summary

Significantly different (P < 0.05)?

Data analyzed

Sample size, column A

Sample size, column B

DCX BO P21

PreVPA

vs.

Control

<0.0001

\*\*\*\*

Yes

Two-tailed

t=10.12, df=10

21.52

11.12

-10.40  $\pm$  1.027

-12.68 to -8.108

0.9111

8.534, 5, 5

0.0344

\*

Yes

6

6

#### Figure 4 E. NeuN

Test for normal distribution

Shapiro-Wilk test

|                                     |        |        |
|-------------------------------------|--------|--------|
| W                                   | 0.9157 | 0.9449 |
| P value                             | 0.4752 | 0.6989 |
| Passed normality test (alpha=0.05)? | Yes    | Yes    |
| P value summary                     | ns     | ns     |
| Number of values                    | 6      | 6      |

Table Analyzed

NeuN BO P21

Column B

PreVPA

vs.

vs.

Column A

Control

Unpaired t test

P value

0.2083

P value summary

ns

Significantly different (P < 0.05)?

No

One- or two-tailed P value?

Two-tailed

t, df

t=1.345, df=10

How big is the difference?

Mean of column A

16.84

Mean of column B

15.65

Difference between means (B - A)  $\pm$  SEM

-1.188  $\pm$  0.8830

95% confidence interval

-3.155 to 0.7797

R squared (eta squared)

0.1532

F test to compare variances

F, DFn, Dfd

2.902, 5, 5

P value

0.2672

P value summary

ns

Significantly different (P < 0.05)?

No

Data analyzed

Sample size, column A

6

Sample size, column B

6

#### Figure 4 G. GFAP

Test for normal distribution

Shapiro-Wilk test

|                                     |        |        |
|-------------------------------------|--------|--------|
| W                                   | 0.9578 | 0.8638 |
| P value                             | 0.8029 | 0.2024 |
| Passed normality test (alpha=0.05)? | Yes    | Yes    |
| P value summary                     | ns     | ns     |
| Number of values                    | 6      | 6      |

Table Analyzed

GFAP BO Post21

Column B

PostVPA

vs.

vs.

Column A

Control

Unpaired t test

|                                        |                |
|----------------------------------------|----------------|
| P value                                | <0.0001        |
| P value summary                        | ****           |
| Significantly different (P < 0.05)?    | Yes            |
| One- or two-tailed P value?            | Two-tailed     |
| t, df                                  | t=14.53, df=10 |
| How big is the difference?             |                |
| Mean of column A                       | 11.17          |
| Mean of column B                       | 24.63          |
| Difference between means (B - A) ± SEM | 13.45 ± 0.9258 |
| 95% confidence interval                | 11.39 to 15.52 |
| R squared (eta squared)                | 0.9548         |
| F test to compare variances            |                |
| F, DFn, Dfd                            | 25.06, 5, 5    |
| P value                                | 0.0030         |
| P value summary                        | **             |
| Significantly different (P < 0.05)?    | Yes            |
| Data analyzed                          |                |
| Sample size, column A                  | 6              |
| Sample size, column B                  | 6              |

#### Figure 4 G. Doublecortin

|                                     |        |        |
|-------------------------------------|--------|--------|
| Test for normal distribution        |        |        |
| Shapiro-Wilk test                   |        |        |
| W                                   | 0.9593 | 0.9705 |
| P value                             | 0.8140 | 0.8956 |
| Passed normality test (alpha=0.05)? | Yes    | Yes    |
| P value summary                     | ns     | ns     |
| Number of values                    | 6      | 6      |

|                                        |                  |
|----------------------------------------|------------------|
| Table Analyzed                         | DCX BO Post21    |
| Column B                               | PostVPA          |
| vs.                                    | vs.              |
| Column A                               | Control          |
| Unpaired t test                        |                  |
| P value                                | <0.0001          |
| P value summary                        | ****             |
| Significantly different (P < 0.05)?    | Yes              |
| One- or two-tailed P value?            | Two-tailed       |
| t, df                                  | t=6.952, df=10   |
| How big is the difference?             |                  |
| Mean of column A                       | 19.66            |
| Mean of column B                       | 12.84            |
| Difference between means (B - A) ± SEM | -6.820 ± 0.9809  |
| 95% confidence interval                | -9.005 to -4.634 |
| R squared (eta squared)                | 0.8286           |
| F test to compare variances            |                  |
| F, DFn, Dfd                            | 3.849, 5, 5      |
| P value                                | 0.1654           |
| P value summary                        | ns               |

|                                         |    |
|-----------------------------------------|----|
| Significantly different ( $P < 0.05$ )? | No |
| Data analyzed                           |    |
| Sample size, column A                   | 6  |
| Sample size, column B                   | 6  |

#### Figure 4 G. NeuN

Test for normal distribution

Shapiro-Wilk test

|                                          |        |        |
|------------------------------------------|--------|--------|
| W                                        | 0.7981 | 0.9366 |
| P value                                  | 0.0565 | 0.6322 |
| Passed normality test ( $\alpha=0.05$ )? | Yes    | Yes    |
| P value summary                          | ns     | ns     |
| Number of values                         | 6      | 6      |

Table Analyzed

Column B

vs.

Column A

Unpaired t test

P value

P value summary

Significantly different ( $P < 0.05$ )?

One- or two-tailed P value?

t, df

How big is the difference?

Mean of column A

Mean of column B

Difference between means ( $B - A$ )  $\pm$  SEM

95% confidence interval

R squared (eta squared)

F test to compare variances

F, DFn, Dfd

P value

P value summary

Significantly different ( $P < 0.05$ )?

Data analyzed

Sample size, column A

Sample size, column B

NeuN BO Post21

PostVPA

vs.

Control

0.6943

ns

No

Two-tailed

$t=0.4046$ ,  $df=10$

14.97

14.56

$-0.4143 \pm 1.024$

$-2.696$  to  $1.868$

0.01610

8.597, 5, 5

0.0339

\*

Yes

6

6

## The ELISA results of the tests for normality and variance homogeneity

### Figure 2 B, BDNF

|                                        |                  |        |
|----------------------------------------|------------------|--------|
| Test for normal distribution           |                  |        |
| Shapiro-Wilk test                      |                  |        |
| W                                      | 0.9745           | 0.8323 |
| P value                                | 0.9214           | 0.1124 |
| Passed normality test (alpha=0.05)?    | Yes              | Yes    |
| P value summary                        | ns               | ns     |
| Number of values                       | 6                | 6      |
| Table Analyzed                         | PFC BDNF P14 Pre |        |
| Column B                               | PreVPA           |        |
| vs.                                    | vs.              |        |
| Column A                               | Control          |        |
| Unpaired t test                        |                  |        |
| P value                                | 0.6849           |        |
| P value summary                        | ns               |        |
| Significantly different (P < 0.05)?    | No               |        |
| One- or two-tailed P value?            | Two-tailed       |        |
| t, df                                  | t=0.4178, df=10  |        |
| How big is the difference?             |                  |        |
| Mean of column A                       | 127.6            |        |
| Mean of column B                       | 135.1            |        |
| Difference between means (B - A) ± SEM | 7.528 ± 18.02    |        |
| 95% confidence interval                | -32.62 to 47.67  |        |
| R squared (eta squared)                | 0.01716          |        |
| F test to compare variances            |                  |        |
| F, DFn, Dfd                            | 1.975, 5, 5      |        |
| P value                                | 0.4730           |        |
| P value summary                        | ns               |        |
| Significantly different (P < 0.05)?    | No               |        |

### Figure 2 B, Nt-3

|                                     |                 |        |
|-------------------------------------|-----------------|--------|
| Test for normal distribution        |                 |        |
| Shapiro-Wilk test                   |                 |        |
| W                                   | 0.9882          | 0.8969 |
| P value                             | 0.9730          | 0.3561 |
| Passed normality test (alpha=0.05)? | Yes             | Yes    |
| P value summary                     | ns              | ns     |
| Number of values                    | 5               | 6      |
| Table Analyzed                      | PFC NT3 P14 Pre |        |
| Column B                            | PreVPA          |        |
| vs.                                 | vs.             |        |
| Column A                            | Control         |        |
| Unpaired t test                     |                 |        |
| P value                             | 0.0254          |        |
| P value summary                     | *               |        |
| Significantly different (P < 0.05)? | Yes             |        |



|                                            |                    |
|--------------------------------------------|--------------------|
| One- or two-tailed P value?                | Two-tailed         |
| t, df                                      | t=2.676, df=9      |
| How big is the difference?                 |                    |
| Mean of column A                           | 49.84              |
| Mean of column B                           | 37.25              |
| Difference between means (B - A) $\pm$ SEM | -12.60 $\pm$ 4.707 |
| 95% confidence interval                    | -23.24 to -1.948   |
| R squared (eta squared)                    | 0.4431             |
| F test to compare variances                |                    |
| F, DFn, Dfd                                | 1.495, 5, 4        |
| P value                                    | 0.7179             |
| P value summary                            | ns                 |
| Significantly different (P < 0.05)?        | No                 |

### Figure 2 B, IGF

|                                            |                    |        |
|--------------------------------------------|--------------------|--------|
| Test for normal distribution               |                    |        |
| Shapiro-Wilk test                          |                    |        |
| W                                          | 0.8705             | 0.9705 |
| P value                                    | 0.2282             | 0.8955 |
| Passed normality test (alpha=0.05)?        | Yes                | Yes    |
| P value summary                            | ns                 | ns     |
| Number of values                           | 6                  | 6      |
| Table Analyzed                             | PFC IGFP14 Pre     |        |
| Column B                                   | PreVPA             |        |
| vs.                                        | vs.                |        |
| Column A                                   | Control            |        |
| Unpaired t test                            |                    |        |
| P value                                    | 0.0540             |        |
| P value summary                            | ns                 |        |
| Significantly different (P < 0.05)?        | No                 |        |
| One- or two-tailed P value?                | Two-tailed         |        |
| t, df                                      | t=2.183, df=10     |        |
| How big is the difference?                 |                    |        |
| Mean of column A                           | 279.0              |        |
| Mean of column B                           | 186.8              |        |
| Difference between means (B - A) $\pm$ SEM | -92.20 $\pm$ 42.23 |        |
| 95% confidence interval                    | -186.3 to 1.907    |        |
| R squared (eta squared)                    | 0.3227             |        |
| F test to compare variances                |                    |        |
| F, DFn, Dfd                                | 26.24, 5, 5        |        |
| P value                                    | 0.0027             |        |
| P value summary                            | **                 |        |
| Significantly different (P < 0.05)?        | Yes                |        |

### Figure 2 D, BDNF

|                              |        |        |
|------------------------------|--------|--------|
| Test for normal distribution |        |        |
| Shapiro-Wilk test            |        |        |
| W                            | 0.9745 | 0.9611 |
| P value                      | 0.9214 | 0.8158 |

|                                            |                   |                    |
|--------------------------------------------|-------------------|--------------------|
| Passed normality test (alpha=0.05)?        | Yes               | Yes                |
| P value summary                            | ns                | ns                 |
| Number of values                           | 6                 | 5                  |
| Table Analyzed                             | PFC BDNF P14 Post |                    |
| Column B                                   |                   | PostVPA            |
| vs.                                        |                   | vs.                |
| Column A                                   |                   | Control            |
| Unpaired t test                            |                   |                    |
| P value                                    |                   | 0.9365             |
| P value summary                            |                   | ns                 |
| Significantly different (P < 0.05)?        |                   | No                 |
| One- or two-tailed P value?                |                   | Two-tailed         |
| t, df                                      |                   | t=0.08198, df=9    |
| How big is the difference?                 |                   |                    |
| Mean of column A                           |                   | 127.6              |
| Mean of column B                           |                   | 126.2              |
| Difference between means (B - A) $\pm$ SEM |                   | -1.428 $\pm$ 17.42 |
| 95% confidence interval                    |                   | -40.83 to 37.98    |
| R squared (eta squared)                    |                   | 0.0007461          |
| F test to compare variances                |                   |                    |
| F, DFn, Dfd                                |                   | 5.264, 5, 4        |
| P value                                    |                   | 0.1327             |
| P value summary                            |                   | ns                 |
| Significantly different (P < 0.05)?        |                   | No                 |

#### Figure 2 D, Nt-3

|                                            |                  |                    |
|--------------------------------------------|------------------|--------------------|
| Test for normal distribution               |                  |                    |
| Shapiro-Wilk test                          |                  |                    |
| W                                          | 0.9882           | 0.9645             |
| P value                                    | 0.9730           | 0.8074             |
| Passed normality test (alpha=0.05)?        | Yes              | Yes                |
| P value summary                            | ns               | ns                 |
| Number of values                           | 5                | 4                  |
| Table Analyzed                             | PFC Nt3 P14 Post |                    |
| Column B                                   |                  | PostVPA            |
| vs.                                        |                  | vs.                |
| Column A                                   |                  | Control            |
| Unpaired t test                            |                  |                    |
| P value                                    |                  | 0.0009             |
| P value summary                            |                  | ***                |
| Significantly different (P < 0.05)?        |                  | Yes                |
| One- or two-tailed P value?                |                  | Two-tailed         |
| t, df                                      |                  | t=5.522, df=7      |
| How big is the difference?                 |                  |                    |
| Mean of column A                           |                  | 49.84              |
| Mean of column B                           |                  | 28.39              |
| Difference between means (B - A) $\pm$ SEM |                  | -21.45 $\pm$ 3.884 |
| 95% confidence interval                    |                  | -30.63 to -12.27   |
| R squared (eta squared)                    |                  | 0.8133             |
| F test to compare variances                |                  |                    |

|                                     |             |
|-------------------------------------|-------------|
| F, DFn, Dfd                         | 3.147, 4, 3 |
| P value                             | 0.3733      |
| P value summary                     | ns          |
| Significantly different (P < 0.05)? | No          |

### Figure 2 D, IGF

|                                        |        |                  |
|----------------------------------------|--------|------------------|
| Test for normal distribution           |        |                  |
| Shapiro-Wilk test                      |        |                  |
| W                                      | 0.8705 | 0.9342           |
| P value                                | 0.2282 | 0.6129           |
| Passed normality test (alpha=0.05)?    | Yes    | Yes              |
| P value summary                        | ns     | ns               |
| Number of values                       | 6      | 6                |
| Table Analyzed                         |        | PFC IGF P14 Post |
| Column B                               |        | PostVPA          |
| vs.                                    |        | vs.              |
| Column A                               |        | Control          |
| Unpaired t test                        |        |                  |
| P value                                |        | 0.0014           |
| P value summary                        |        | **               |
| Significantly different (P < 0.05)?    |        | Yes              |
| One- or two-tailed P value?            |        | Two-tailed       |
| t, df                                  |        | t=4.388, df=10   |
| How big is the difference?             |        |                  |
| Mean of column A                       |        | 279.0            |
| Mean of column B                       |        | 96.82            |
| Difference between means (B - A) ± SEM |        | -182.2 ± 41.53   |
| 95% confidence interval                |        | -274.8 to -89.69 |
| R squared (eta squared)                |        | 0.6581           |
| F test to compare variances            |        |                  |
| F, DFn, Dfd                            |        | 260.4, 5, 5      |
| P value                                |        | <0.0001          |
| P value summary                        |        | ****             |
| Significantly different (P < 0.05)?    |        | Yes              |

### Figure 2 F, BDNF

|                                     |        |                  |
|-------------------------------------|--------|------------------|
| Test for normal distribution        |        |                  |
| Shapiro-Wilk test                   |        |                  |
| W                                   | 0.8957 | 0.8003           |
| P value                             | 0.3867 | 0.0815           |
| Passed normality test (alpha=0.05)? | Yes    | Yes              |
| P value summary                     | ns     | ns               |
| Number of values                    | 5      | 5                |
| Table Analyzed                      |        | PFC BDNF P21 Pre |
| Column B                            |        | PreVPA           |
| vs.                                 |        | vs.              |
| Column A                            |        | Control          |
| Unpaired t test                     |        |                  |
| P value                             |        | 0.5349           |

|                                        |                 |
|----------------------------------------|-----------------|
| P value summary                        | ns              |
| Significantly different (P < 0.05)?    | No              |
| One- or two-tailed P value?            | Two-tailed      |
| t, df                                  | t=0.6484, df=8  |
| How big is the difference?             |                 |
| Mean of column A                       | 189.5           |
| Mean of column B                       | 174.3           |
| Difference between means (B - A) ± SEM | -15.21 ± 23.45  |
| 95% confidence interval                | -69.29 to 38.88 |
| R squared (eta squared)                | 0.04993         |
| F test to compare variances            |                 |
| F, DFn, Dfd                            | 1.777, 4, 4     |
| P value                                | 0.5911          |
| P value summary                        | ns              |
| Significantly different (P < 0.05)?    | No              |

### Figure 2 F, Nt-3

|                                        |         |                 |
|----------------------------------------|---------|-----------------|
| Test for normal distribution           |         |                 |
| Shapiro-Wilk test                      |         |                 |
| W                                      | 0.9764  | 0.7435          |
| P value                                | 0.9323  | 0.0259          |
| Passed normality test (alpha=0.05)?    | Yes     | No              |
| P value summary                        | ns      | *               |
| Number of values                       | 6       | 5               |
| Table Analyzed                         | PFC NT3 | P21 Pre         |
| Column B                               |         | PreVPA          |
| vs.                                    |         | vs.             |
| Column A                               |         | Control         |
| Unpaired t test                        |         |                 |
| P value                                |         | 0.0864          |
| P value summary                        |         | ns              |
| Significantly different (P < 0.05)?    |         | No              |
| One- or two-tailed P value?            |         | Two-tailed      |
| t, df                                  |         | t=1.925, df=9   |
| How big is the difference?             |         |                 |
| Mean of column A                       |         | 140.2           |
| Mean of column B                       |         | 172.6           |
| Difference between means (B - A) ± SEM |         | 32.41 ± 16.84   |
| 95% confidence interval                |         | -5.684 to 70.51 |
| R squared (eta squared)                |         | 0.2916          |
| F test to compare variances            |         |                 |
| F, DFn, Dfd                            |         | 1.420, 5, 4     |
| P value                                |         | 0.7561          |
| P value summary                        |         | ns              |
| Significantly different (P < 0.05)?    |         | No              |

### Figure 2 F, IGF

Test for normal distribution  
Shapiro-Wilk test

|                                            |                   |        |
|--------------------------------------------|-------------------|--------|
| W                                          | 0.9764            | 0.7435 |
| P value                                    | 0.9323            | 0.0259 |
| Passed normality test (alpha=0.05)?        | Yes               | No     |
| P value summary                            | ns                | *      |
| Number of values                           | 6                 | 5      |
| Table Analyzed                             | PFC NT3 P21 Pre   |        |
| Column B                                   | PreVPA            |        |
| vs.                                        | vs.               |        |
| Column A                                   | Control           |        |
| Unpaired t test                            |                   |        |
| P value                                    | 0.0864            |        |
| P value summary                            | ns                |        |
| Significantly different (P < 0.05)?        | No                |        |
| One- or two-tailed P value?                | Two-tailed        |        |
| t, df                                      | t=1.925, df=9     |        |
| How big is the difference?                 |                   |        |
| Mean of column A                           | 140.2             |        |
| Mean of column B                           | 172.6             |        |
| Difference between means (B - A) $\pm$ SEM | 32.41 $\pm$ 16.84 |        |
| 95% confidence interval                    | -5.684 to 70.51   |        |
| R squared (eta squared)                    | 0.2916            |        |
| F test to compare variances                |                   |        |
| F, DFn, Dfd                                | 1.420, 5, 4       |        |
| P value                                    | 0.7561            |        |
| P value summary                            | ns                |        |
| Significantly different (P < 0.05)?        | No                |        |

### Figure 3 H, BDNF

|                                            |                   |        |
|--------------------------------------------|-------------------|--------|
| Test for normal distribution               |                   |        |
| Shapiro-Wilk test                          |                   |        |
| W                                          | 0.8658            | 0.9525 |
| P value                                    | 0.2100            | 0.7548 |
| Passed normality test (alpha=0.05)?        | Yes               | Yes    |
| P value summary                            | ns                | ns     |
| Number of values                           | 6                 | 5      |
| Table Analyzed                             | PFC BDNF P21 Post |        |
| Column B                                   | PostVPA           |        |
| vs.                                        | vs.               |        |
| Column A                                   | Control           |        |
| Unpaired t test                            |                   |        |
| P value                                    | 0.1742            |        |
| P value summary                            | ns                |        |
| Significantly different (P < 0.05)?        | No                |        |
| One- or two-tailed P value?                | Two-tailed        |        |
| t, df                                      | t=1.476, df=9     |        |
| How big is the difference?                 |                   |        |
| Mean of column A                           | 270.4             |        |
| Mean of column B                           | 341.5             |        |
| Difference between means (B - A) $\pm$ SEM | 71.10 $\pm$ 48.19 |        |
| 95% confidence interval                    | -37.91 to 180.1   |        |

|                                      |             |
|--------------------------------------|-------------|
| R squared (eta squared)              | 0.1948      |
| F test to compare variances          |             |
| F, DF <sub>n</sub> , D <sub>fd</sub> | 2.514, 5, 4 |
| P value                              | 0.3926      |
| P value summary                      | ns          |
| Significantly different (P < 0.05)?  | No          |

### Figure 2 H, NT-3

|                                        |                  |        |
|----------------------------------------|------------------|--------|
| Test for normal distribution           |                  |        |
| Shapiro-Wilk test                      |                  |        |
| W                                      | 0.9764           | 0.9585 |
| P value                                | 0.9323           | 0.7972 |
| Passed normality test (alpha=0.05)?    | Yes              | Yes    |
| P value summary                        | ns               | ns     |
| Table Analyzed                         | PFC NT3 P21 Post |        |
| Column B                               | PostVPA          |        |
| vs.                                    | vs.              |        |
| Column A                               | Control          |        |
| Unpaired t test                        |                  |        |
| P value                                | 0.8696           |        |
| P value summary                        | ns               |        |
| Significantly different (P < 0.05)?    | No               |        |
| One- or two-tailed P value?            | Two-tailed       |        |
| t, df                                  | t=0.1689, df=9   |        |
| How big is the difference?             |                  |        |
| Mean of column A                       | 140.2            |        |
| Mean of column B                       | 144.8            |        |
| Difference between means (B - A) ± SEM | 4.563 ± 27.02    |        |
| 95% confidence interval                | -56.56 to 65.69  |        |
| R squared (eta squared)                | 0.003159         |        |
| F test to compare variances            |                  |        |
| F, DFn, Dfd                            | 3.782, 4, 5      |        |
| P value                                | 0.1771           |        |
| P value summary                        | ns               |        |
| Significantly different (P < 0.05)?    | No               |        |

### Figure 2 H, IGF

|                                     |                  |        |
|-------------------------------------|------------------|--------|
| Test for normal distribution        |                  |        |
| Shapiro-Wilk test                   |                  |        |
| W                                   | 0.9412           | 0.9219 |
| P value                             | 0.6689           | 0.5425 |
| Passed normality test (alpha=0.05)? | Yes              | Yes    |
| P value summary                     | ns               | ns     |
| Number of values                    | 6                | 5      |
| Table Analyzed                      | PFC IGF P21 Post |        |
| Column B                            | PostVPA          |        |
| vs.                                 | vs.              |        |
| Column A                            | Control          |        |
| Unpaired t test                     |                  |        |

|                                        |                |
|----------------------------------------|----------------|
| P value                                | 0.0047         |
| P value summary                        | **             |
| Significantly different (P < 0.05)?    | Yes            |
| One- or two-tailed P value?            | Two-tailed     |
| t, df                                  | t=3.725, df=9  |
| How big is the difference?             |                |
| Mean of column A                       | 204.6          |
| Mean of column B                       | 427.7          |
| Difference between means (B - A) ± SEM | 223.1 ± 59.90  |
| 95% confidence interval                | 87.60 to 358.6 |
| R squared (eta squared)                | 0.6065         |
| F test to compare variances            |                |
| F, DFn, Dfd                            | 4.894, 4, 5    |
| P value                                | 0.1117         |
| P value summary                        | ns             |
| Significantly different (P < 0.05)?    | No             |

### Figure 3 B, BDNF

|                                        |                  |        |
|----------------------------------------|------------------|--------|
| Test for normal distribution           |                  |        |
| Shapiro-Wilk test                      |                  |        |
| W                                      | 0.9181           | 0.9288 |
| P value                                | 0.4921           | 0.5705 |
| Passed normality test (alpha=0.05)?    | Yes              | Yes    |
| P value summary                        | ns               | ns     |
| Number of values                       | 6                | 6      |
| Table Analyzed                         | HIP BDNF P14 Pre |        |
| Column B                               | PreVPA           |        |
| vs.                                    | vs.              |        |
| Column A                               | Control          |        |
| Unpaired t test                        |                  |        |
| P value                                | 0.0016           |        |
| P value summary                        | **               |        |
| Significantly different (P < 0.05)?    | Yes              |        |
| One- or two-tailed P value?            | Two-tailed       |        |
| t, df                                  | t=4.276, df=10   |        |
| How big is the difference?             |                  |        |
| Mean of column A                       | 100.2            |        |
| Mean of column B                       | 154.4            |        |
| Difference between means (B - A) ± SEM | 54.21 ± 12.68    |        |
| 95% confidence interval                | 25.96 to 82.46   |        |
| R squared (eta squared)                | 0.6465           |        |
| F test to compare variances            |                  |        |
| F, DFn, Dfd                            | 1.151, 5, 5      |        |
| P value                                | 0.8815           |        |
| P value summary                        | ns               |        |
| Significantly different (P < 0.05)?    | No               |        |

### Figure 3 B, Nt-3

Test for normal distribution

|                                        |                 |                |
|----------------------------------------|-----------------|----------------|
| Shapiro-Wilk test                      |                 |                |
| W                                      | 0.9704          | 0.9769         |
| P value                                | 0.8777          | 0.8835         |
| Passed normality test (alpha=0.05)?    | Yes             | Yes            |
| P value summary                        | ns              | ns             |
| Number of values                       | 5               | 4              |
| Table Analyzed                         | Hip Nt3 P14 Pre |                |
| Column B                               |                 | PreVPA         |
| vs.                                    |                 | vs.            |
| Column A                               |                 | Control        |
| Unpaired t test                        |                 |                |
| P value                                |                 | 0.0007         |
| P value summary                        |                 | ***            |
| Significantly different (P < 0.05)?    |                 | Yes            |
| One- or two-tailed P value?            |                 | Two-tailed     |
| t, df                                  |                 | t=5.769, df=7  |
| How big is the difference?             |                 |                |
| Mean of column A                       |                 | 31.23          |
| Mean of column B                       |                 | 78.26          |
| Difference between means (B - A) ± SEM |                 | 47.03 ± 8.152  |
| 95% confidence interval                |                 | 27.75 to 66.31 |
| R squared (eta squared)                |                 | 0.8262         |
| F test to compare variances            |                 |                |
| F, DFn, Dfd                            |                 | 7.994, 3, 4    |
| P value                                |                 | 0.0729         |
| P value summary                        |                 | ns             |
| Significantly different (P < 0.05)?    |                 | No             |

### Figure 3 B, IGF

|                                        |                 |                |
|----------------------------------------|-----------------|----------------|
| Test for normal distribution           |                 |                |
| Shapiro-Wilk test                      |                 |                |
| W                                      | 0.9146          | 0.9062         |
| P value                                | 0.4956          | 0.4116         |
| Passed normality test (alpha=0.05)?    | Yes             | Yes            |
| P value summary                        | ns              | ns             |
| Number of values                       | 5               | 6              |
| Table Analyzed                         | HIP IGF P14 Pre |                |
| Column B                               |                 | PreVPA         |
| vs.                                    |                 | vs.            |
| Column A                               |                 | Control        |
| Unpaired t test                        |                 |                |
| P value                                |                 | <0.0001        |
| P value summary                        |                 | ****           |
| Significantly different (P < 0.05)?    |                 | Yes            |
| One- or two-tailed P value?            |                 | Two-tailed     |
| t, df                                  |                 | t=7.133, df=9  |
| How big is the difference?             |                 |                |
| Mean of column A                       |                 | 274.2          |
| Mean of column B                       |                 | 127.6          |
| Difference between means (B - A) ± SEM |                 | -146.6 ± 20.55 |



|                                     |                  |
|-------------------------------------|------------------|
| 95% confidence interval             | -193.1 to -100.1 |
| R squared (eta squared)             | 0.8497           |
| F test to compare variances         |                  |
| F, DFn, Dfd                         | 4.532, 4, 5      |
| P value                             | 0.1286           |
| P value summary                     | ns               |
| Significantly different (P < 0.05)? | No               |

### Figure 3 B, GDNF

|                                        |                  |                 |
|----------------------------------------|------------------|-----------------|
| Test for normal distribution           |                  |                 |
| Shapiro-Wilk test                      |                  |                 |
| W                                      | 0.8845           | 0.9487          |
| P value                                | 0.3303           | 0.7276          |
| Passed normality test (alpha=0.05)?    | Yes              | Yes             |
| P value summary                        | ns               | ns              |
| Number of values                       | 5                | 5               |
| Table Analyzed                         | HIP GDNF P14 Pre |                 |
| Column B                               |                  | PreVPA          |
| vs.                                    |                  | vs.             |
| Column A                               |                  | Control         |
| Unpaired t test                        |                  |                 |
| P value                                |                  | 0.1247          |
| P value summary                        |                  | ns              |
| Significantly different (P < 0.05)?    |                  | No              |
| One- or two-tailed P value?            |                  | Two-tailed      |
| t, df                                  |                  | t=1.715, df=8   |
| How big is the difference?             |                  |                 |
| Mean of column A                       |                  | 34.76           |
| Mean of column B                       |                  | 45.40           |
| Difference between means (B - A) ± SEM |                  | 10.64 ± 6.202   |
| 95% confidence interval                |                  | -3.665 to 24.94 |
| R squared (eta squared)                |                  | 0.2688          |
| F test to compare variances            |                  |                 |
| F, DFn, Dfd                            |                  | 6.100, 4, 4     |
| P value                                |                  | 0.1079          |
| P value summary                        |                  | ns              |
| Significantly different (P < 0.05)?    |                  | No              |

### Figure 3 D, BDNF

|                                     |                   |         |
|-------------------------------------|-------------------|---------|
| Test for normal distribution        |                   |         |
| Shapiro-Wilk test                   |                   |         |
| W                                   | 0.9181            | 0.9230  |
| P value                             | 0.4921            | 0.5492  |
| Passed normality test (alpha=0.05)? | Yes               | Yes     |
| P value summary                     | ns                | ns      |
| Number of values                    | 6                 | 5       |
| Table Analyzed                      | HIP BDNF P14 Post |         |
| Column B                            |                   | PostVPA |
| vs.                                 |                   | vs.     |

|                                            |                   |
|--------------------------------------------|-------------------|
| Column A                                   | Control           |
| Unpaired t test                            |                   |
| P value                                    | 0.1824            |
| P value summary                            | ns                |
| Significantly different (P < 0.05)?        | No                |
| One- or two-tailed P value?                | Two-tailed        |
| t, df                                      | t=1.445, df=9     |
| How big is the difference?                 |                   |
| Mean of column A                           | 100.2             |
| Mean of column B                           | 117.7             |
| Difference between means (B - A) $\pm$ SEM | 17.55 $\pm$ 12.14 |
| 95% confidence interval                    | -9.927 to 45.02   |
| R squared (eta squared)                    | 0.1883            |
| F test to compare variances                |                   |
| F, DFn, Dfd                                | 1.302, 5, 4       |
| P value                                    | 0.8216            |
| P value summary                            | ns                |
| Significantly different (P < 0.05)?        | No                |

### Figure 3 D, NT-3

Test for normal distribution

Shapiro-Wilk test

|                                     |        |        |
|-------------------------------------|--------|--------|
| W                                   | 0.9704 | 0.9822 |
| P value                             | 0.8777 | 0.9458 |
| Passed normality test (alpha=0.05)? | Yes    | Yes    |
| P value summary                     | ns     | ns     |
| Number of values                    | 5      | 5      |

|                                            |                   |
|--------------------------------------------|-------------------|
| Table Analyzed                             | Hip Nt3 P14 Post  |
| Column B                                   | PostVPA           |
| vs.                                        | vs.               |
| Column A                                   | Control           |
| Unpaired t test                            |                   |
| P value                                    | 0.0035            |
| P value summary                            | **                |
| Significantly different (P < 0.05)?        | Yes               |
| One- or two-tailed P value?                | Two-tailed        |
| t, df                                      | t=4.090, df=8     |
| How big is the difference?                 |                   |
| Mean of column A                           | 31.23             |
| Mean of column B                           | 59.85             |
| Difference between means (B - A) $\pm$ SEM | 28.62 $\pm$ 6.998 |
| 95% confidence interval                    | 12.48 to 44.76    |
| R squared (eta squared)                    | 0.6764            |
| F test to compare variances                |                   |
| F, DFn, Dfd                                | 5.629, 4, 4       |
| P value                                    | 0.1228            |
| P value summary                            | ns                |
| Significantly different (P < 0.05)?        | No                |

**Figure 3 D, IGF**

Test for normal distribution

Shapiro-Wilk test

|   |        |        |
|---|--------|--------|
| W | 0.9146 | 0.9775 |
|---|--------|--------|

|         |        |        |
|---------|--------|--------|
| P value | 0.4956 | 0.9387 |
|---------|--------|--------|

|                                     |     |     |
|-------------------------------------|-----|-----|
| Passed normality test (alpha=0.05)? | Yes | Yes |
|-------------------------------------|-----|-----|

|                 |    |    |
|-----------------|----|----|
| P value summary | ns | ns |
|-----------------|----|----|

|                  |   |   |
|------------------|---|---|
| Number of values | 5 | 6 |
|------------------|---|---|

|                |                  |  |
|----------------|------------------|--|
| Table Analyzed | HIP IGF P14 Post |  |
|----------------|------------------|--|

|          |         |  |
|----------|---------|--|
| Column B | PostVPA |  |
|----------|---------|--|

|     |     |  |
|-----|-----|--|
| vs. | vs. |  |
|-----|-----|--|

|          |         |  |
|----------|---------|--|
| Column A | Control |  |
|----------|---------|--|

Unpaired t test

|         |         |  |
|---------|---------|--|
| P value | <0.0001 |  |
|---------|---------|--|

|                 |      |  |
|-----------------|------|--|
| P value summary | **** |  |
|-----------------|------|--|

|                                     |     |  |
|-------------------------------------|-----|--|
| Significantly different (P < 0.05)? | Yes |  |
|-------------------------------------|-----|--|

|                             |            |  |
|-----------------------------|------------|--|
| One- or two-tailed P value? | Two-tailed |  |
|-----------------------------|------------|--|

|       |               |  |
|-------|---------------|--|
| t, df | t=9.070, df=9 |  |
|-------|---------------|--|

How big is the difference?

|                  |       |  |
|------------------|-------|--|
| Mean of column A | 274.2 |  |
|------------------|-------|--|

|                  |       |  |
|------------------|-------|--|
| Mean of column B | 101.8 |  |
|------------------|-------|--|

|                                            |                    |  |
|--------------------------------------------|--------------------|--|
| Difference between means (B - A) $\pm$ SEM | -172.4 $\pm$ 19.01 |  |
|--------------------------------------------|--------------------|--|

|                         |                  |  |
|-------------------------|------------------|--|
| 95% confidence interval | -215.4 to -129.4 |  |
|-------------------------|------------------|--|

|                         |        |  |
|-------------------------|--------|--|
| R squared (eta squared) | 0.9014 |  |
|-------------------------|--------|--|

F test to compare variances

|                                      |             |  |
|--------------------------------------|-------------|--|
| F, DF <sub>n</sub> , DF <sub>d</sub> | 13.69, 4, 5 |  |
|--------------------------------------|-------------|--|

|         |        |  |
|---------|--------|--|
| P value | 0.0133 |  |
|---------|--------|--|

|                 |   |  |
|-----------------|---|--|
| P value summary | * |  |
|-----------------|---|--|

|                                     |     |  |
|-------------------------------------|-----|--|
| Significantly different (P < 0.05)? | Yes |  |
|-------------------------------------|-----|--|

**Figure 3 D, GDNF**

Test for normal distribution

Shapiro-Wilk test

|   |        |        |
|---|--------|--------|
| W | 0.9035 | 0.9079 |
|---|--------|--------|

|         |        |        |
|---------|--------|--------|
| P value | 0.4297 | 0.4550 |
|---------|--------|--------|

|                                     |     |     |
|-------------------------------------|-----|-----|
| Passed normality test (alpha=0.05)? | Yes | Yes |
|-------------------------------------|-----|-----|

|                 |    |    |
|-----------------|----|----|
| P value summary | ns | ns |
|-----------------|----|----|

|                  |   |   |
|------------------|---|---|
| Number of values | 5 | 5 |
|------------------|---|---|

|                |                   |  |
|----------------|-------------------|--|
| Table Analyzed | HIP GDNF P14 Post |  |
|----------------|-------------------|--|

|          |         |  |
|----------|---------|--|
| Column B | PostVPA |  |
|----------|---------|--|

|     |     |  |
|-----|-----|--|
| vs. | vs. |  |
|-----|-----|--|

|          |         |  |
|----------|---------|--|
| Column A | Control |  |
|----------|---------|--|

Unpaired t test

|         |         |  |
|---------|---------|--|
| P value | <0.0001 |  |
|---------|---------|--|

|                 |      |  |
|-----------------|------|--|
| P value summary | **** |  |
|-----------------|------|--|

|                                     |     |  |
|-------------------------------------|-----|--|
| Significantly different (P < 0.05)? | Yes |  |
|-------------------------------------|-----|--|

|                             |            |  |
|-----------------------------|------------|--|
| One- or two-tailed P value? | Two-tailed |  |
|-----------------------------|------------|--|

|       |               |  |
|-------|---------------|--|
| t, df | t=7.286, df=8 |  |
|-------|---------------|--|

How big is the difference?

|                                            |                   |
|--------------------------------------------|-------------------|
| Mean of column A                           | 32.76             |
| Mean of column B                           | 75.02             |
| Difference between means (B - A) $\pm$ SEM | 42.25 $\pm$ 5.799 |
| 95% confidence interval                    | 28.88 to 55.63    |
| R squared (eta squared)                    | 0.8690            |
| F test to compare variances                |                   |
| F, DFn, Dfd                                | 1.543, 4, 4       |
| P value                                    | 0.6846            |
| P value summary                            | ns                |
| Significantly different (P < 0.05)?        | No                |

### Figure 3 F, BDNF

|                                            |          |                   |
|--------------------------------------------|----------|-------------------|
| Test for normal distribution               |          |                   |
| Shapiro-Wilk test                          |          |                   |
| W                                          | 0.9272   | 0.8553            |
| P value                                    | 0.5777   | 0.2117            |
| Passed normality test (alpha=0.05)?        | Yes      | Yes               |
| P value summary                            | ns       | ns                |
| Number of values                           | 5        | 5                 |
| Table Analyzed                             | HIP BDNF | P21 Pre           |
| Column B                                   |          | PreVPA            |
| vs.                                        |          | vs.               |
| Column A                                   |          | Control           |
| Unpaired t test                            |          |                   |
| P value                                    |          | 0.0042            |
| P value summary                            |          | **                |
| Significantly different (P < 0.05)?        |          | Yes               |
| One- or two-tailed P value?                |          | Two-tailed        |
| t, df                                      |          | t=3.956, df=8     |
| How big is the difference?                 |          |                   |
| Mean of column A                           |          | 228.9             |
| Mean of column B                           |          | 272.8             |
| Difference between means (B - A) $\pm$ SEM |          | 43.85 $\pm$ 11.08 |
| 95% confidence interval                    |          | 18.29 to 69.41    |
| R squared (eta squared)                    |          | 0.6617            |
| F test to compare variances                |          |                   |
| F, DFn, Dfd                                |          | 1.205, 4, 4       |
| P value                                    |          | 0.8611            |
| P value summary                            |          | ns                |
| Significantly different (P < 0.05)?        |          | No                |

### Figure 3 F, Nt-3

|                                     |        |        |
|-------------------------------------|--------|--------|
| Test for normal distribution        |        |        |
| Shapiro-Wilk test                   |        |        |
| W                                   | 0.8685 | 0.9327 |
| P value                             | 0.2604 | 0.6147 |
| Passed normality test (alpha=0.05)? | Yes    | Yes    |
| P value summary                     | ns     | ns     |
| Number of values                    | 5      | 5      |

|                                            |                    |
|--------------------------------------------|--------------------|
| Table Analyzed                             | HIP Nt3 P21 Pre    |
| Column B                                   | PreVPA             |
| vs.                                        | vs.                |
| Column A                                   | Control            |
| Unpaired t test                            |                    |
| P value                                    | 0.0084             |
| P value summary                            | **                 |
| Significantly different (P < 0.05)?        | Yes                |
| One- or two-tailed P value?                | Two-tailed         |
| t, df                                      | t=3.470, df=8      |
| How big is the difference?                 |                    |
| Mean of column A                           | 144.9              |
| Mean of column B                           | 92.48              |
| Difference between means (B - A) $\pm$ SEM | -52.37 $\pm$ 15.09 |
| 95% confidence interval                    | -87.17 to -17.57   |
| R squared (eta squared)                    | 0.6008             |
| F test to compare variances                |                    |
| F, DF <sub>n</sub> , Df <sub>d</sub>       | 3.199, 4, 4        |
| P value                                    | 0.2863             |
| P value summary                            | ns                 |
| Significantly different (P < 0.05)?        | No                 |

### Figure 3 F, IGF

|                                        |                 |                  |
|----------------------------------------|-----------------|------------------|
| Test for normal distribution           |                 |                  |
| Shapiro-Wilk test                      |                 |                  |
| W                                      | 0.9828          | 0.9724           |
| P value                                | 0.9489          | 0.8905           |
| Passed normality test (alpha=0.05)?    | Yes             | Yes              |
| P value summary                        | ns              | ns               |
| Number of values                       | 5               | 5                |
| Table Analyzed                         | HIP IGF P21 Pre |                  |
| Column B                               |                 | PreVPA           |
| vs.                                    |                 | vs.              |
| Column A                               |                 | Control          |
| Unpaired t test                        |                 |                  |
| P value                                |                 | 0.0115           |
| P value summary                        |                 | *                |
| Significantly different (P < 0.05)?    |                 | Yes              |
| One- or two-tailed P value?            |                 | Two-tailed       |
| t, df                                  |                 | t=3.261, df=8    |
| How big is the difference?             |                 |                  |
| Mean of column A                       |                 | 137.6            |
| Mean of column B                       |                 | 71.94            |
| Difference between means (B - A) ± SEM |                 | -65.67 ± 20.14   |
| 95% confidence interval                |                 | -112.1 to -19.24 |
| R squared (eta squared)                |                 | 0.5707           |
| F test to compare variances            |                 |                  |
| F, DFn, Dfd                            |                 | 1.068, 4, 4      |
| P value                                |                 | 0.9509           |
| P value summary                        |                 | ns               |

Significantly different (P < 0.05)?

No

### Figure 3 F, GDNF

Test for normal distribution

Shapiro-Wilk test

W

0.8646

0.9792

P value

0.2451

0.9303

Passed normality test (alpha=0.05)?

Yes

Yes

P value summary

ns

ns

Number of values

5

5

Table Analyzed

Hip GDNF P21 Pre

Column B

PreVPA

vs.

vs.

Column A

Control

Unpaired t test

P value

0.0126

P value summary

\*

Significantly different (P < 0.05)?

Yes

One- or two-tailed P value?

Two-tailed

t, df

t=3.198, df=8

How big is the difference?

Mean of column A

101.2

Mean of column B

70.08

Difference between means (B - A) ± SEM

-31.10 ± 9.725

95% confidence interval

-53.53 to -8.675

R squared (eta squared)

0.5611

F test to compare variances

F, DF<sub>n</sub>, D<sub>fd</sub>

1.414, 4, 4

P value

0.7453

P value summary

ns

Significantly different (P < 0.05)?

No

### Figure 3 H, BDNF

Test for normal distribution

Shapiro-Wilk test

W

0.8625

0.8208

P value

0.1980

0.0897

Passed normality test (alpha=0.05)?

Yes

Yes

P value summary

ns

ns

Number of values

6

6

Table Analyzed

Hip BDNF P21 Post

Column B

PostVPA

vs.

vs.

Column A

Control

Unpaired t test

P value

0.0057

P value summary

\*\*

Significantly different (P < 0.05)?

Yes

One- or two-tailed P value?

Two-tailed

|                                            |                   |
|--------------------------------------------|-------------------|
| t, df                                      | t=3.506, df=10    |
| How big is the difference?                 |                   |
| Mean of column A                           | 235.4             |
| Mean of column B                           | 440.8             |
| Difference between means (B - A) $\pm$ SEM | 205.3 $\pm$ 58.57 |
| 95% confidence interval                    | 74.85 to 335.8    |
| R squared (eta squared)                    | 0.5514            |
| F test to compare variances                |                   |
| F, DFn, Dfd                                | 6.093, 5, 5       |
| P value                                    | 0.0692            |
| P value summary                            | ns                |
| Significantly different (P < 0.05)?        | No                |

### Figure 3 H, NT-3

|                                            |                    |        |
|--------------------------------------------|--------------------|--------|
| Test for normal distribution               |                    |        |
| Shapiro-Wilk test                          |                    |        |
| W                                          | 0.9803             | 0.9347 |
| P value                                    | 0.9362             | 0.6286 |
| Passed normality test (alpha=0.05)?        | Yes                | Yes    |
| P value summary                            | ns                 | ns     |
| Number of values                           | 5                  | 5      |
| Table Analyzed                             | Hip Nt3 P21 Post   |        |
| Column B                                   | PostVPA            |        |
| vs.                                        | vs.                |        |
| Column A                                   | Control            |        |
| Unpaired t test                            |                    |        |
| P value                                    | <0.0001            |        |
| P value summary                            | ****               |        |
| Significantly different (P < 0.05)?        | Yes                |        |
| One- or two-tailed P value?                | Two-tailed         |        |
| t, df                                      | t=12.94, df=8      |        |
| How big is the difference?                 |                    |        |
| Mean of column A                           | 104.5              |        |
| Mean of column B                           | 49.58              |        |
| Difference between means (B - A) $\pm$ SEM | -54.96 $\pm$ 4.247 |        |
| 95% confidence interval                    | -64.75 to -45.17   |        |
| R squared (eta squared)                    | 0.9544             |        |
| F test to compare variances                |                    |        |
| F, DFn, Dfd                                | 1.028, 4, 4        |        |
| P value                                    | 0.9794             |        |
| P value summary                            | ns                 |        |
| Significantly different (P < 0.05)?        | No                 |        |

### Figure 3 H, IGF

|                                     |        |        |
|-------------------------------------|--------|--------|
| Test for normal distribution        |        |        |
| Shapiro-Wilk test                   |        |        |
| W                                   | 0.9399 | 0.9982 |
| P value                             | 0.6583 | 0.9990 |
| Passed normality test (alpha=0.05)? | Yes    | Yes    |

|                                            |                   |    |
|--------------------------------------------|-------------------|----|
| P value summary                            | ns                | ns |
| Number of values                           | 6                 | 5  |
| Table Analyzed                             | HIP IGF P21 Post  |    |
| Column B                                   | PostVPA           |    |
| vs.                                        | vs.               |    |
| Column A                                   | Control           |    |
| Unpaired t test                            |                   |    |
| P value                                    | <0.0001           |    |
| P value summary                            | ****              |    |
| Significantly different (P < 0.05)?        | Yes               |    |
| One- or two-tailed P value?                | Two-tailed        |    |
| t, df                                      | t=6.810, df=9     |    |
| How big is the difference?                 |                   |    |
| Mean of column A                           | 97.72             |    |
| Mean of column B                           | 276.5             |    |
| Difference between means (B - A) $\pm$ SEM | 178.8 $\pm$ 26.25 |    |
| 95% confidence interval                    | 119.4 to 238.1    |    |
| R squared (eta squared)                    | 0.8375            |    |
| F test to compare variances                |                   |    |
| F, DFn, Dfd                                | 10.71, 4, 5       |    |
| P value                                    | 0.0229            |    |
| P value summary                            | *                 |    |
| Significantly different (P < 0.05)?        | Yes               |    |

### Figure 3 H, GDNF

|                                            |                    |        |
|--------------------------------------------|--------------------|--------|
| Test for normal distribution               |                    |        |
| Shapiro-Wilk test                          |                    |        |
| W                                          | 0.9675             | 0.9169 |
| P value                                    | 0.8749             | 0.4831 |
| Passed normality test (alpha=0.05)?        | Yes                | Yes    |
| P value summary                            | ns                 | ns     |
| Number of values                           | 6                  | 6      |
| Table Analyzed                             | Hip GDNF P21 Post  |        |
| Column B                                   | PostVPA            |        |
| vs.                                        | vs.                |        |
| Column A                                   | Control            |        |
| Unpaired t test                            |                    |        |
| P value                                    | 0.0007             |        |
| P value summary                            | ***                |        |
| Significantly different (P < 0.05)?        | Yes                |        |
| One- or two-tailed P value?                | Two-tailed         |        |
| t, df                                      | t=4.796, df=10     |        |
| How big is the difference?                 |                    |        |
| Mean of column A                           | 97.85              |        |
| Mean of column B                           | 66.15              |        |
| Difference between means (B - A) $\pm$ SEM | -31.70 $\pm$ 6.609 |        |
| 95% confidence interval                    | -46.43 to -16.97   |        |
| R squared (eta squared)                    | 0.6970             |        |
| F test to compare variances                |                    |        |
| F, DFn, Dfd                                | 2.987, 5, 5        |        |



|                                     |        |
|-------------------------------------|--------|
| P value                             | 0.2550 |
| P value summary                     | ns     |
| Significantly different (P < 0.05)? | No     |

#### Figure 4 B, BDNF

|                                        |                 |        |
|----------------------------------------|-----------------|--------|
| Test for normal distribution           |                 |        |
| Shapiro-Wilk test                      |                 |        |
| W                                      | 0.9862          | 0.9085 |
| P value                                | 0.9646          | 0.4584 |
| Passed normality test (alpha=0.05)?    | Yes             | Yes    |
| P value summary                        | ns              | ns     |
| Number of values                       | 5               | 5      |
| Table Analyzed                         | OB BDNF P14 Pre |        |
| Column B                               | PreVPA          |        |
| vs.                                    | vs.             |        |
| Column A                               | Control         |        |
| Unpaired t test                        |                 |        |
| P value                                | 0.0002          |        |
| P value summary                        | ***             |        |
| Significantly different (P < 0.05)?    | Yes             |        |
| One- or two-tailed P value?            | Two-tailed      |        |
| t, df                                  | t=6.345, df=8   |        |
| How big is the difference?             |                 |        |
| Mean of column A                       | 120.2           |        |
| Mean of column B                       | 188.7           |        |
| Difference between means (B - A) ± SEM | 68.44 ± 10.79   |        |
| 95% confidence interval                | 43.57 to 93.31  |        |
| R squared (eta squared)                | 0.8342          |        |
| F test to compare variances            |                 |        |
| F, DFn, Dfd                            | 1.702, 4, 4     |        |
| P value                                | 0.6191          |        |
| P value summary                        | ns              |        |
| Significantly different (P < 0.05)?    | No              |        |

#### Figure 4 B, Nt-3

|                                     |                |        |
|-------------------------------------|----------------|--------|
| Test for normal distribution        |                |        |
| Shapiro-Wilk test                   |                |        |
| W                                   | 0.9522         | 0.8270 |
| P value                             | 0.7578         | 0.1014 |
| Passed normality test (alpha=0.05)? | Yes            | Yes    |
| P value summary                     | ns             | ns     |
| Number of values                    | 6              | 6      |
| Table Analyzed                      | BO NT3 P14 Pre |        |
| Column B                            | PreVPA         |        |
| vs.                                 | vs.            |        |
| Column A                            | Control        |        |
| Unpaired t test                     |                |        |
| P value                             | 0.7197         |        |
| P value summary                     | ns             |        |

|                                        |                 |
|----------------------------------------|-----------------|
| Significantly different (P < 0.05)?    | No              |
| One- or two-tailed P value?            | Two-tailed      |
| t, df                                  | t=0.3692, df=10 |
| How big is the difference?             |                 |
| Mean of column A                       | 30.39           |
| Mean of column B                       | 31.19           |
| Difference between means (B - A) ± SEM | 0.8000 ± 2.167  |
| 95% confidence interval                | -4.028 to 5.628 |
| R squared (eta squared)                | 0.01345         |
| F test to compare variances            |                 |
| F, DF <sub>n</sub> , Df <sub>d</sub>   | 1.479, 5, 5     |
| P value                                | 0.6780          |
| P value summary                        | ns              |
| Significantly different (P < 0.05)?    | No              |

#### Figure 4 B, IGF

|                                        |                |                  |
|----------------------------------------|----------------|------------------|
| Test for normal distribution           |                |                  |
| Shapiro-Wilk test                      |                |                  |
| W                                      | 0.9148         | 0.9015           |
| P value                                | 0.4690         | 0.3831           |
| Passed normality test (alpha=0.05)?    | Yes            | Yes              |
| P value summary                        | ns             | ns               |
| Number of values                       | 6              | 6                |
| Table Analyzed                         | BO IGF P14 Pre |                  |
| Column B                               | PreVPA         |                  |
| vs.                                    | vs.            |                  |
| Column A                               | Control        |                  |
| Unpaired t test                        |                |                  |
| P value                                |                | 0.0478           |
| P value summary                        |                | *                |
| Significantly different (P < 0.05)?    |                | Yes              |
| One- or two-tailed P value?            |                | Two-tailed       |
| t, df                                  |                | t=2.255, df=10   |
| How big is the difference?             |                |                  |
| Mean of column A                       |                | 438.0            |
| Mean of column B                       |                | 315.4            |
| Difference between means (B - A) ± SEM |                | -122.6 ± 54.37   |
| 95% confidence interval                |                | -243.7 to -1.473 |
| R squared (eta squared)                |                | 0.3371           |
| F test to compare variances            |                |                  |
| F, DF <sub>n</sub> , Df <sub>d</sub>   |                | 2.332, 5, 5      |
| P value                                |                | 0.3742           |
| P value summary                        |                | ns               |
| Significantly different (P < 0.05)?    |                | No               |

#### Figure 4 B, GDNF

|                              |        |        |
|------------------------------|--------|--------|
| Test for normal distribution |        |        |
| Shapiro-Wilk test            |        |        |
| W                            | 0.8553 | 0.9247 |

|                                            |                    |        |
|--------------------------------------------|--------------------|--------|
| P value                                    | 0.2118             | 0.5607 |
| Passed normality test (alpha=0.05)?        | Yes                | Yes    |
| P value summary                            | ns                 | ns     |
| Number of values                           | 5                  | 5      |
| Table Analyzed                             | OB GDNF P14 Pre    |        |
| Column B                                   | PreVPA             |        |
| vs.                                        | vs.                |        |
| Column A                                   | Control            |        |
| Unpaired t test                            |                    |        |
| P value                                    | 0.0886             |        |
| P value summary                            | ns                 |        |
| Significantly different (P < 0.05)?        | No                 |        |
| One- or two-tailed P value?                | Two-tailed         |        |
| t, df                                      | t=1.938, df=8      |        |
| How big is the difference?                 |                    |        |
| Mean of column A                           | 85.04              |        |
| Mean of column B                           | 46.67              |        |
| Difference between means (B - A) $\pm$ SEM | -38.37 $\pm$ 19.80 |        |
| 95% confidence interval                    | -84.02 to 7.284    |        |
| R squared (eta squared)                    | 0.3195             |        |
| F test to compare variances                |                    |        |
| F, DFn, Dfd                                | 29.72, 4, 4        |        |
| P value                                    | 0.0062             |        |
| P value summary                            | **                 |        |
| Significantly different (P < 0.05)?        | Yes                |        |

#### Figure 4 D, BDNF

|                                            |                   |        |
|--------------------------------------------|-------------------|--------|
| Test for normal distribution               |                   |        |
| Shapiro-Wilk test                          |                   |        |
| W                                          | 0.9862            | 0.9789 |
| P value                                    | 0.9646            | 0.9286 |
| Passed normality test (alpha=0.05)?        | Yes               | Yes    |
| P value summary                            | ns                | ns     |
| Number of values                           | 5                 | 5      |
| Table Analyzed                             | OB BDNF P14 Psot  |        |
| Column B                                   | PostVPA           |        |
| vs.                                        | vs.               |        |
| Column A                                   | Control           |        |
| Unpaired t test                            |                   |        |
| P value                                    | 0.0004            |        |
| P value summary                            | ***               |        |
| Significantly different (P < 0.05)?        | Yes               |        |
| One- or two-tailed P value?                | Two-tailed        |        |
| t, df                                      | t=5.845, df=8     |        |
| How big is the difference?                 |                   |        |
| Mean of column A                           | 120.2             |        |
| Mean of column B                           | 172.2             |        |
| Difference between means (B - A) $\pm$ SEM | 52.01 $\pm$ 8.899 |        |
| 95% confidence interval                    | 31.49 to 72.53    |        |
| R squared (eta squared)                    | 0.8103            |        |

|                                     |             |
|-------------------------------------|-------------|
| F test to compare variances         |             |
| F, DFn, Dfd                         | 12.39, 4, 4 |
| P value                             | 0.0318      |
| P value summary                     | *           |
| Significantly different (P < 0.05)? | Yes         |

#### Figure 4 D, Nt-3

|                                        |                 |        |
|----------------------------------------|-----------------|--------|
| Test for normal distribution           |                 |        |
| Shapiro-Wilk test                      |                 |        |
| W                                      | 0.9522          | 0.8491 |
| P value                                | 0.7578          | 0.1547 |
| Passed normality test (alpha=0.05)?    | Yes             | Yes    |
| P value summary                        | ns              | ns     |
| Number of values                       | 6               | 6      |
| Table Analyzed                         | BO NT3 P14 Post |        |
| Column B                               | PostVPA         |        |
| vs.                                    | vs.             |        |
| Column A                               | Control         |        |
| Unpaired t test                        |                 |        |
| P value                                | 0.1589          |        |
| P value summary                        | ns              |        |
| Significantly different (P < 0.05)?    | No              |        |
| One- or two-tailed P value?            | Two-tailed      |        |
| t, df                                  | t=1.522, df=10  |        |
| How big is the difference?             |                 |        |
| Mean of column A                       | 30.39           |        |
| Mean of column B                       | 33.78           |        |
| Difference between means (B - A) ± SEM | 3.395 ± 2.230   |        |
| 95% confidence interval                | -1.574 to 8.364 |        |
| R squared (eta squared)                | 0.1882          |        |
| F test to compare variances            |                 |        |
| F, DFn, Dfd                            | 1.290, 5, 5     |        |
| P value                                | 0.7868          |        |
| P value summary                        | ns              |        |
| Significantly different (P < 0.05)?    | No              |        |

#### Figure 4 D, IGF

|                                     |                 |        |
|-------------------------------------|-----------------|--------|
| Test for normal distribution        |                 |        |
| Shapiro-Wilk test                   |                 |        |
| W                                   | 0.9148          | 0.8406 |
| P value                             | 0.4690          | 0.1318 |
| Passed normality test (alpha=0.05)? | Yes             | Yes    |
| P value summary                     | ns              | ns     |
| Number of values                    | 6               | 6      |
| Table Analyzed                      | BO IGF P14 Post |        |
| Column B                            | PostVPA         |        |
| vs.                                 | vs.             |        |
| Column A                            | Control         |        |
| Unpaired t test                     |                 |        |

|                                        |                  |
|----------------------------------------|------------------|
| P value                                | 0.0018           |
| P value summary                        | **               |
| Significantly different (P < 0.05)?    | Yes              |
| One- or two-tailed P value?            | Two-tailed       |
| t, df                                  | t=4.214, df=10   |
| How big is the difference?             |                  |
| Mean of column A                       | 438.0            |
| Mean of column B                       | 215.8            |
| Difference between means (B - A) ± SEM | -222.3 ± 52.74   |
| 95% confidence interval                | -339.8 to -104.7 |
| R squared (eta squared)                | 0.6398           |
| F test to compare variances            |                  |
| F, DF <sub>n</sub> , Df <sub>d</sub>   | 2.903, 5, 5      |
| P value                                | 0.2670           |
| P value summary                        | ns               |
| Significantly different (P < 0.05)?    | No               |

#### Figure 4 D, GDNF

Test for normal distribution

Shapiro-Wilk test

W

P value

Passed normality test (alpha=0.05)?

P value summary

Number of values

Table Analyzed

OB GDNF P14 Post

Column B

PostVPA

vs.

vs.

Column A

Control

Unpaired t test

P value

0.9725

P value summary

ns

Significantly different (P < 0.05)?

No

One- or two-tailed P value?

Two-tailed

t, df

t=0.03552, df=8

How big is the difference?

Mean of column A

81.04

Mean of column B

81.69

Difference between means (B - A) ± SEM

0.6500 ± 18.30

95% confidence interval

-41.55 to 42.85

R squared (eta squared)

0.0001577

F test to compare variances

F, DF<sub>n</sub>, Df<sub>d</sub>

2.880, 4, 4

|                                     |        |
|-------------------------------------|--------|
| P value                             | 0.3300 |
| P value summary                     | ns     |
| Significantly different (P < 0.05)? | No     |

#### Figure 4 F, BDNF

|                                        |             |                  |
|----------------------------------------|-------------|------------------|
| Test for normal distribution           |             |                  |
| Shapiro-Wilk test                      |             |                  |
| W                                      | 0.8800      | 0.9403           |
| P value                                | 0.3093      | 0.6681           |
| Passed normality test (alpha=0.05)?    | Yes         | Yes              |
| P value summary                        | ns          | ns               |
| Number of values                       | 5           | 5                |
| Table Analyzed                         | OB GDNF P21 | Pre              |
| Column B                               |             | PreVPA           |
| vs.                                    |             | vs.              |
| Column A                               |             | Control          |
| Unpaired t test                        |             |                  |
| P value                                |             | 0.0010           |
| P value summary                        |             | **               |
| Significantly different (P < 0.05)?    |             | Yes              |
| One- or two-tailed P value?            |             | Two-tailed       |
| t, df                                  |             | t=5.029, df=8    |
| How big is the difference?             |             |                  |
| Mean of column A                       |             | 69.76            |
| Mean of column B                       |             | 26.13            |
| Difference between means (B - A) ± SEM |             | -43.63 ± 8.676   |
| 95% confidence interval                |             | -63.64 to -23.62 |
| R squared (eta squared)                |             | 0.7597           |
| F test to compare variances            |             |                  |
| F, DFn, Dfd                            |             | 11.40, 4, 4      |
| P value                                |             | 0.0369           |
| P value summary                        |             | *                |
| Significantly different (P < 0.05)?    |             | Yes              |

#### Figure 4 F, Nt-3

|                                     |            |         |
|-------------------------------------|------------|---------|
| Test for normal distribution        |            |         |
| Shapiro-Wilk test                   |            |         |
| W                                   | 0.9682     | 0.8921  |
| P value                             | 0.8635     | 0.3680  |
| Passed normality test (alpha=0.05)? | Yes        | Yes     |
| P value summary                     | ns         | ns      |
| Number of values                    | 5          | 5       |
| Table Analyzed                      | BO NT3 P21 | Pre     |
| Column B                            |            | PreVPA  |
| vs.                                 |            | vs.     |
| Column A                            |            | Control |
| Unpaired t test                     |            |         |
| P value                             |            | <0.0001 |

|                                        |                  |
|----------------------------------------|------------------|
| P value summary                        | ****             |
| Significantly different (P < 0.05)?    | Yes              |
| One- or two-tailed P value?            | Two-tailed       |
| t, df                                  | t=13.97, df=8    |
| How big is the difference?             |                  |
| Mean of column A                       | 196.6            |
| Mean of column B                       | 102.1            |
| Difference between means (B - A) ± SEM | -94.53 ± 6.767   |
| 95% confidence interval                | -110.1 to -78.92 |
| R squared (eta squared)                | 0.9606           |
| F test to compare variances            |                  |
| F, DFn, Dfd                            | 2.410, 4, 4      |
| P value                                | 0.4150           |
| P value summary                        | ns               |
| Significantly different (P < 0.05)?    | No               |

#### Figure 4 F, IGF

|                                        |                 |        |
|----------------------------------------|-----------------|--------|
| Test for normal distribution           |                 |        |
| Shapiro-Wilk test                      |                 |        |
| W                                      | 0.8395          | 0.9940 |
| P value                                | 0.1634          | 0.9916 |
| Passed normality test (alpha=0.05)?    | Yes             | Yes    |
| P value summary                        | ns              | ns     |
| Number of values                       | 5               | 5      |
| Table Analyzed                         | BO IGF P21 Pre  |        |
| Column B                               | PreVPA          |        |
| vs.                                    | vs.             |        |
| Column A                               | Control         |        |
| Unpaired t test                        |                 |        |
| P value                                | 0.0752          |        |
| P value summary                        | ns              |        |
| Significantly different (P < 0.05)?    | No              |        |
| One- or two-tailed P value?            | Two-tailed      |        |
| t, df                                  | t=2.044, df=8   |        |
| How big is the difference?             |                 |        |
| Mean of column A                       | 468.2           |        |
| Mean of column B                       | 329.5           |        |
| Difference between means (B - A) ± SEM | -138.7 ± 67.86  |        |
| 95% confidence interval                | -295.2 to 17.76 |        |
| R squared (eta squared)                | 0.3431          |        |
| F test to compare variances            |                 |        |
| F, DFn, Dfd                            | 7.370, 4, 4     |        |
| P value                                | 0.0788          |        |
| P value summary                        | ns              |        |
| Significantly different (P < 0.05)?    | No              |        |

#### Figure 4 F, GDNF

Test for normal distribution  
Shapiro-Wilk test

|                                            |                 |                    |
|--------------------------------------------|-----------------|--------------------|
| W                                          | 0.8800          | 0.9403             |
| P value                                    | 0.3093          | 0.6681             |
| Passed normality test (alpha=0.05)?        | Yes             | Yes                |
| P value summary                            | ns              | ns                 |
| Number of values                           | 5               | 5                  |
| Table Analyzed                             | OB GDNF P21 Pre |                    |
| Column B                                   |                 | PreVPA             |
| vs.                                        |                 | vs.                |
| Column A                                   |                 | Control            |
| Unpaired t test                            |                 |                    |
| P value                                    |                 | 0.0010             |
| P value summary                            |                 | **                 |
| Significantly different (P < 0.05)?        |                 | Yes                |
| One- or two-tailed P value?                |                 | Two-tailed         |
| t, df                                      |                 | t=5.029, df=8      |
| How big is the difference?                 |                 |                    |
| Mean of column A                           |                 | 69.76              |
| Mean of column B                           |                 | 26.13              |
| Difference between means (B - A) $\pm$ SEM |                 | -43.63 $\pm$ 8.676 |
| 95% confidence interval                    |                 | -63.64 to -23.62   |
| R squared (eta squared)                    |                 | 0.7597             |
| F test to compare variances                |                 |                    |
| F, DFn, Dfd                                |                 | 11.40, 4, 4        |
| P value                                    |                 | 0.0369             |
| P value summary                            |                 | *                  |
| Significantly different (P < 0.05)?        |                 | Yes                |

#### Figure 4 H, BDNF

|                                            |                  |                   |
|--------------------------------------------|------------------|-------------------|
| Test for normal distribution               |                  |                   |
| Shapiro-Wilk test                          |                  |                   |
| W                                          | 0.9425           | 0.8938            |
| P value                                    | 0.6791           | 0.3384            |
| Passed normality test (alpha=0.05)?        | Yes              | Yes               |
| P value summary                            | ns               | ns                |
| Number of values                           | 6                | 6                 |
| Table Analyzed                             | OB BDNF P21 Post |                   |
| Column B                                   |                  | PostVPA           |
| vs.                                        |                  | vs.               |
| Column A                                   |                  | Control           |
| Unpaired t test                            |                  |                   |
| P value                                    |                  | 0.0314            |
| P value summary                            |                  | *                 |
| Significantly different (P < 0.05)?        |                  | Yes               |
| One- or two-tailed P value?                |                  | Two-tailed        |
| t, df                                      |                  | t=2.501, df=10    |
| How big is the difference?                 |                  |                   |
| Mean of column A                           |                  | 281.6             |
| Mean of column B                           |                  | 430.0             |
| Difference between means (B - A) $\pm$ SEM |                  | 148.4 $\pm$ 59.31 |
| 95% confidence interval                    |                  | 16.19 to 280.5    |



|                                     |             |
|-------------------------------------|-------------|
| R squared (eta squared)             | 0.3848      |
| F test to compare variances         |             |
| F, DFn, Dfd                         | 1.167, 5, 5 |
| P value                             | 0.8698      |
| P value summary                     | ns          |
| Significantly different (P < 0.05)? | No          |

#### Figure 4 H, Nt-3

|                                        |                 |        |
|----------------------------------------|-----------------|--------|
| Test for normal distribution           |                 |        |
| Shapiro-Wilk test                      |                 |        |
| W                                      | 0.9206          | 0.9540 |
| P value                                | 0.5094          | 0.7722 |
| Passed normality test (alpha=0.05)?    | Yes             | Yes    |
| P value summary                        | ns              | ns     |
| Number of values                       | 6               | 6      |
| Table Analyzed                         | BO Nt P21 Post  |        |
| Column B                               | PostVPA         |        |
| vs.                                    | vs.             |        |
| Column A                               | Control         |        |
| Unpaired t test                        |                 |        |
| P value                                | 0.2552          |        |
| P value summary                        | ns              |        |
| Significantly different (P < 0.05)?    | No              |        |
| One- or two-tailed P value?            | Two-tailed      |        |
| t, df                                  | t=1.207, df=10  |        |
| How big is the difference?             |                 |        |
| Mean of column A                       | 168.4           |        |
| Mean of column B                       | 200.4           |        |
| Difference between means (B - A) ± SEM | 32.02 ± 26.52   |        |
| 95% confidence interval                | -27.08 to 91.11 |        |
| R squared (eta squared)                | 0.1272          |        |
| F test to compare variances            |                 |        |
| F, DFn, Dfd                            | 3.077, 5, 5     |        |
| P value                                | 0.2429          |        |
| P value summary                        | ns              |        |
| Significantly different (P < 0.05)?    | No              |        |

#### Figure 4 H, IGF

|                                     |                 |        |
|-------------------------------------|-----------------|--------|
| Test for normal distribution        |                 |        |
| Shapiro-Wilk test                   |                 |        |
| W                                   | 0.9818          | 0.8700 |
| P value                             | 0.9603          | 0.2263 |
| Passed normality test (alpha=0.05)? | Yes             | Yes    |
| P value summary                     | ns              | ns     |
| Number of values                    | 6               | 6      |
| Table Analyzed                      | BO IGF P21 Post |        |
| Column B                            | PostVPA         |        |
| vs.                                 | vs.             |        |
| Column A                            | Control         |        |

|                                        |                |
|----------------------------------------|----------------|
| Unpaired t test                        |                |
| P value                                | 0.0041         |
| P value summary                        | **             |
| Significantly different (P < 0.05)?    | Yes            |
| One- or two-tailed P value?            | Two-tailed     |
| t, df                                  | t=3.695, df=10 |
| How big is the difference?             |                |
| Mean of column A                       | 221.2          |
| Mean of column B                       | 383.6          |
| Difference between means (B - A) ± SEM | 162.4 ± 43.94  |
| 95% confidence interval                | 64.47 to 260.3 |
| R squared (eta squared)                | 0.5773         |
| F test to compare variances            |                |
| F, DFn, Dfd                            | 1.853, 5, 5    |
| P value                                | 0.5148         |
| P value summary                        | ns             |
| Significantly different (P < 0.05)?    | No             |

#### Figure 4 H, GDNF

|                                        |                  |        |
|----------------------------------------|------------------|--------|
| Test for normal distribution           |                  |        |
| Shapiro-Wilk test                      |                  |        |
| W                                      | 0.8771           | 0.8716 |
| P value                                | 0.2559           | 0.2328 |
| Passed normality test (alpha=0.05)?    | Yes              | Yes    |
| P value summary                        | ns               | ns     |
| Number of values                       | 6                | 6      |
| Table Analyzed                         | OB GDNF P21 Post |        |
| Column B                               | PostVPA          |        |
| vs.                                    | vs.              |        |
| Column A                               | Control          |        |
| Unpaired t test                        |                  |        |
| P value                                | 0.8134           |        |
| P value summary                        | ns               |        |
| Significantly different (P < 0.05)?    | No               |        |
| One- or two-tailed P value?            | Two-tailed       |        |
| t, df                                  | t=0.2424, df=10  |        |
| How big is the difference?             |                  |        |
| Mean of column A                       | 69.77            |        |
| Mean of column B                       | 72.08            |        |
| Difference between means (B - A) ± SEM | 2.317 ± 9.559    |        |
| 95% confidence interval                | -18.98 to 23.61  |        |
| R squared (eta squared)                | 0.005840         |        |
| F test to compare variances            |                  |        |
| F, DFn, Dfd                            | 1.020, 5, 5      |        |
| P value                                | 0.9832           |        |
| P value summary                        | ns               |        |
| Significantly different (P < 0.05)?    | No               |        |

### Figure 5 B, BDNF

Test for normal distribution

Shapiro-Wilk test

|   |        |        |
|---|--------|--------|
| W | 0.8746 | 0.7573 |
|---|--------|--------|

|         |        |        |
|---------|--------|--------|
| P value | 0.2855 | 0.0347 |
|---------|--------|--------|

|                                     |     |    |
|-------------------------------------|-----|----|
| Passed normality test (alpha=0.05)? | Yes | No |
|-------------------------------------|-----|----|

|                 |    |   |
|-----------------|----|---|
| P value summary | ns | * |
|-----------------|----|---|

|                  |   |   |
|------------------|---|---|
| Number of values | 5 | 5 |
|------------------|---|---|

|                |                  |  |
|----------------|------------------|--|
| Table Analyzed | SVZ BDNF P14 Pre |  |
|----------------|------------------|--|

|          |        |  |
|----------|--------|--|
| Column B | PreVPA |  |
|----------|--------|--|

|     |     |  |
|-----|-----|--|
| vs. | vs. |  |
|-----|-----|--|

|          |         |  |
|----------|---------|--|
| Column A | Control |  |
|----------|---------|--|

Unpaired t test

|         |        |  |
|---------|--------|--|
| P value | 0.0047 |  |
|---------|--------|--|

|                 |    |  |
|-----------------|----|--|
| P value summary | ** |  |
|-----------------|----|--|

|                                     |     |  |
|-------------------------------------|-----|--|
| Significantly different (P < 0.05)? | Yes |  |
|-------------------------------------|-----|--|

|                             |            |  |
|-----------------------------|------------|--|
| One- or two-tailed P value? | Two-tailed |  |
|-----------------------------|------------|--|

|       |               |  |
|-------|---------------|--|
| t, df | t=3.879, df=8 |  |
|-------|---------------|--|

How big is the difference?

|                  |       |  |
|------------------|-------|--|
| Mean of column A | 194.8 |  |
|------------------|-------|--|

|                  |       |  |
|------------------|-------|--|
| Mean of column B | 121.2 |  |
|------------------|-------|--|

|                                            |                    |  |
|--------------------------------------------|--------------------|--|
| Difference between means (B - A) $\pm$ SEM | -73.67 $\pm$ 18.99 |  |
|--------------------------------------------|--------------------|--|

|                         |                  |  |
|-------------------------|------------------|--|
| 95% confidence interval | -117.5 to -29.87 |  |
|-------------------------|------------------|--|

|                         |        |  |
|-------------------------|--------|--|
| R squared (eta squared) | 0.6529 |  |
|-------------------------|--------|--|

F test to compare variances

|             |             |  |
|-------------|-------------|--|
| F, DFn, Dfd | 10.19, 4, 4 |  |
|-------------|-------------|--|

|         |        |  |
|---------|--------|--|
| P value | 0.0451 |  |
|---------|--------|--|

|                 |   |  |
|-----------------|---|--|
| P value summary | * |  |
|-----------------|---|--|

|                                     |     |  |
|-------------------------------------|-----|--|
| Significantly different (P < 0.05)? | Yes |  |
|-------------------------------------|-----|--|

### Figure 5 B, Nt-3

Test for normal distribution

Shapiro-Wilk test

|   |        |        |
|---|--------|--------|
| W | 0.9624 | 0.9041 |
|---|--------|--------|

|         |        |        |
|---------|--------|--------|
| P value | 0.7941 | 0.3988 |
|---------|--------|--------|

|                                     |     |     |
|-------------------------------------|-----|-----|
| Passed normality test (alpha=0.05)? | Yes | Yes |
|-------------------------------------|-----|-----|

|                 |    |    |
|-----------------|----|----|
| P value summary | ns | ns |
|-----------------|----|----|

|                  |   |   |
|------------------|---|---|
| Number of values | 4 | 6 |
|------------------|---|---|

|                |                 |  |
|----------------|-----------------|--|
| Table Analyzed | SVZ Nt3 P14 Pre |  |
|----------------|-----------------|--|

|          |        |  |
|----------|--------|--|
| Column B | PreVPA |  |
|----------|--------|--|

|     |     |  |
|-----|-----|--|
| vs. | vs. |  |
|-----|-----|--|

|          |         |  |
|----------|---------|--|
| Column A | Control |  |
|----------|---------|--|

Unpaired t test

|         |        |  |
|---------|--------|--|
| P value | 0.0261 |  |
|---------|--------|--|

|                 |   |  |
|-----------------|---|--|
| P value summary | * |  |
|-----------------|---|--|

|                                     |     |  |
|-------------------------------------|-----|--|
| Significantly different (P < 0.05)? | Yes |  |
|-------------------------------------|-----|--|

|                             |            |  |
|-----------------------------|------------|--|
| One- or two-tailed P value? | Two-tailed |  |
|-----------------------------|------------|--|

|       |               |  |
|-------|---------------|--|
| t, df | t=2.723, df=8 |  |
|-------|---------------|--|

How big is the difference?

|                                            |                    |
|--------------------------------------------|--------------------|
| Mean of column A                           | 67.18              |
| Mean of column B                           | 43.06              |
| Difference between means (B - A) $\pm$ SEM | -24.12 $\pm$ 8.859 |
| 95% confidence interval                    | -44.55 to -3.692   |
| R squared (eta squared)                    | 0.4810             |
| F test to compare variances                |                    |
| F, DFn, Dfd                                | 1.499, 3, 5        |
| P value                                    | 0.6448             |
| P value summary                            | ns                 |
| Significantly different (P < 0.05)?        | No                 |

#### Figure 5 B, IGF

|                                            |                    |        |
|--------------------------------------------|--------------------|--------|
| Test for normal distribution               |                    |        |
| Shapiro-Wilk test                          |                    |        |
| W                                          | 0.9792             | 0.9095 |
| P value                                    | 0.9305             | 0.4332 |
| Passed normality test (alpha=0.05)?        | Yes                | Yes    |
| P value summary                            | ns                 | ns     |
| Number of values                           | 5                  | 6      |
| Table Analyzed                             | SVZ IGF P14 Pre    |        |
| Column B                                   | PreVPA             |        |
| vs.                                        | vs.                |        |
| Column A                                   | Control            |        |
| Unpaired t test                            |                    |        |
| P value                                    | 0.0004             |        |
| P value summary                            | ***                |        |
| Significantly different (P < 0.05)?        | Yes                |        |
| One- or two-tailed P value?                | Two-tailed         |        |
| t, df                                      | t=5.518, df=9      |        |
| How big is the difference?                 |                    |        |
| Mean of column A                           | 298.7              |        |
| Mean of column B                           | 114.1              |        |
| Difference between means (B - A) $\pm$ SEM | -184.5 $\pm$ 33.44 |        |
| 95% confidence interval                    | -260.2 to -108.9   |        |
| R squared (eta squared)                    | 0.7719             |        |
| F test to compare variances                |                    |        |
| F, DFn, Dfd                                | 95.53, 4, 5        |        |
| P value                                    | 0.0001             |        |
| P value summary                            | ***                |        |
| Significantly different (P < 0.05)?        | Yes                |        |

#### Figure 5 D, BDNF

|                                     |        |        |
|-------------------------------------|--------|--------|
| Test for normal distribution        |        |        |
| Shapiro-Wilk test                   |        |        |
| W                                   | 0.8746 | 0.8066 |
| P value                             | 0.2855 | 0.0917 |
| Passed normality test (alpha=0.05)? | Yes    | Yes    |
| P value summary                     | ns     | ns     |
| Number of values                    | 5      | 5      |

|                                            |                    |
|--------------------------------------------|--------------------|
| Table Analyzed                             | SVZ BDNF P14 Post  |
| Column B                                   | PostVPA            |
| vs.                                        | vs.                |
| Column A                                   | Control            |
| Unpaired t test                            |                    |
| P value                                    | 0.0047             |
| P value summary                            | **                 |
| Significantly different (P < 0.05)?        | Yes                |
| One- or two-tailed P value?                | Two-tailed         |
| t, df                                      | t=3.882, df=8      |
| How big is the difference?                 |                    |
| Mean of column A                           | 194.8              |
| Mean of column B                           | 120.0              |
| Difference between means (B - A) $\pm$ SEM | -74.85 $\pm$ 19.28 |
| 95% confidence interval                    | -119.3 to -30.39   |
| R squared (eta squared)                    | 0.6532             |
| F test to compare variances                |                    |
| F, DFn, Dfd                                | 7.586, 4, 4        |
| P value                                    | 0.0751             |
| P value summary                            | ns                 |
| Significantly different (P < 0.05)?        | No                 |

#### Figure 5 D, Nt-3

|                                            |                    |        |
|--------------------------------------------|--------------------|--------|
| Test for normal distribution               |                    |        |
| Shapiro-Wilk test                          |                    |        |
| W                                          | 0.9624             | 0.8595 |
| P value                                    | 0.7941             | 0.2586 |
| Passed normality test (alpha=0.05)?        | Yes                | Yes    |
| P value summary                            | ns                 | ns     |
| Number of values                           | 4                  | 4      |
| Table Analyzed                             | SVZ Nt3 P14 Post   |        |
| Column B                                   | PostVPA            |        |
| vs.                                        | vs.                |        |
| Column A                                   | Control            |        |
| Unpaired t test                            |                    |        |
| P value                                    | 0.0047             |        |
| P value summary                            | **                 |        |
| Significantly different (P < 0.05)?        | Yes                |        |
| One- or two-tailed P value?                | Two-tailed         |        |
| t, df                                      | t=4.373, df=6      |        |
| How big is the difference?                 |                    |        |
| Mean of column A                           | 67.18              |        |
| Mean of column B                           | 30.37              |        |
| Difference between means (B - A) $\pm$ SEM | -36.81 $\pm$ 8.417 |        |
| 95% confidence interval                    | -57.41 to -16.22   |        |
| R squared (eta squared)                    | 0.7612             |        |
| F test to compare variances                |                    |        |
| F, DFn, Dfd                                | 5.221, 3, 3        |        |
| P value                                    | 0.2079             |        |
| P value summary                            | ns                 |        |

Significantly different ( $P < 0.05$ )?

No

#### Figure 5 D, IGF

Test for normal distribution

Shapiro-Wilk test

W

0.9792

0.9158

P value

0.9305

0.4756

Passed normality test ( $\alpha=0.05$ )?

Yes

Yes

P value summary

ns

ns

Number of values

5

6

Table Analyzed

SVZ IGF P14 Post

Column B

PostVPA

vs.

vs.

Column A

Control

Unpaired t test

P value

0.0002

P value summary

\*\*\*

Significantly different ( $P < 0.05$ )?

Yes

One- or two-tailed P value?

Two-tailed

t, df

t=5.839, df=9

How big is the difference?

Mean of column A

298.7

Mean of column B

102.9

Difference between means ( $B - A$ )  $\pm$  SEM

-195.8  $\pm$  33.54

95% confidence interval

-271.7 to -119.9

R squared (eta squared)

0.7911

F test to compare variances

F, DFn, Dfd

65.98, 4, 5

P value

0.0003

P value summary

\*\*\*

Significantly different ( $P < 0.05$ )?

Yes

#### Figure 5 F, BDNF

Test for normal distribution

Shapiro-Wilk test

W

0.8812

0.8858

P value

0.3149

0.3364

Passed normality test ( $\alpha=0.05$ )?

Yes

Yes

P value summary

ns

ns

Number of values

5

5

Table Analyzed

SVZ BDNF P21 Pre

Column B

PreVPA

vs.

vs.

Column A

Control

Unpaired t test

P value

0.0539

P value summary

ns

Significantly different ( $P < 0.05$ )?

No

One- or two-tailed P value?

Two-tailed

|                                            |                   |
|--------------------------------------------|-------------------|
| t, df                                      | t=2.258, df=8     |
| How big is the difference?                 |                   |
| Mean of column A                           | 123.3             |
| Mean of column B                           | 141.8             |
| Difference between means (B - A) $\pm$ SEM | 18.46 $\pm$ 8.176 |
| 95% confidence interval                    | -0.3925 to 37.32  |
| R squared (eta squared)                    | 0.3892            |
| F test to compare variances                |                   |
| F, DFn, Dfd                                | 1.315, 4, 4       |
| P value                                    | 0.7974            |
| P value summary                            | ns                |
| Significantly different (P < 0.05)?        | No                |

### Figure 5 F, Nt-3

|                                            |                 |                   |
|--------------------------------------------|-----------------|-------------------|
| Test for normal distribution               |                 |                   |
| Shapiro-Wilk test                          |                 |                   |
| W                                          | 0.8870          | 0.9890            |
| P value                                    | 0.3422          | 0.9759            |
| Passed normality test (alpha=0.05)?        | Yes             | Yes               |
| P value summary                            | ns              | ns                |
| Number of values                           | 5               | 5                 |
| Table Analyzed                             | SVZ NT3 P21 Pre |                   |
| Column B                                   | PreVPA          |                   |
| vs.                                        | vs.             |                   |
| Column A                                   | Control         |                   |
| Unpaired t test                            |                 |                   |
| P value                                    |                 | 0.4167            |
| P value summary                            |                 | ns                |
| Significantly different (P < 0.05)?        |                 | No                |
| One- or two-tailed P value?                |                 | Two-tailed        |
| t, df                                      |                 | t=0.8564, df=8    |
| How big is the difference?                 |                 |                   |
| Mean of column A                           |                 | 128.9             |
| Mean of column B                           |                 | 140.6             |
| Difference between means (B - A) $\pm$ SEM |                 | 11.70 $\pm$ 13.66 |
| 95% confidence interval                    |                 | -19.80 to 43.20   |
| R squared (eta squared)                    |                 | 0.08398           |
| F test to compare variances                |                 |                   |
| F, DFn, Dfd                                |                 | 4.314, 4, 4       |
| P value                                    |                 | 0.1858            |
| P value summary                            |                 | ns                |
| Significantly different (P < 0.05)?        |                 | No                |

### Figure 5 F, IGF

|                                     |        |        |
|-------------------------------------|--------|--------|
| Test for normal distribution        |        |        |
| Shapiro-Wilk test                   |        |        |
| W                                   | 0.9294 | 0.9259 |
| P value                             | 0.5924 | 0.5689 |
| Passed normality test (alpha=0.05)? | Yes    | Yes    |

|                                            |                    |    |
|--------------------------------------------|--------------------|----|
| P value summary                            | ns                 | ns |
| Number of values                           | 5                  | 5  |
| Table Analyzed                             | SVZ IGF P21 Pre    |    |
| Column B                                   | PreVPA             |    |
| vs.                                        | vs.                |    |
| Column A                                   | Control            |    |
| Unpaired t test                            |                    |    |
| P value                                    | <0.0001            |    |
| P value summary                            | ****               |    |
| Significantly different (P < 0.05)?        | Yes                |    |
| One- or two-tailed P value?                | Two-tailed         |    |
| t, df                                      | t=11.31, df=8      |    |
| How big is the difference?                 |                    |    |
| Mean of column A                           | 79.96              |    |
| Mean of column B                           | 42.50              |    |
| Difference between means (B - A) $\pm$ SEM | -37.46 $\pm$ 3.312 |    |
| 95% confidence interval                    | -45.10 to -29.82   |    |
| R squared (eta squared)                    | 0.9411             |    |
| F test to compare variances                |                    |    |
| F, DF <sub>n</sub> , D <sub>fd</sub>       | 1.902, 4, 4        |    |
| P value                                    | 0.5487             |    |
| P value summary                            | ns                 |    |
| Significantly different (P < 0.05)?        | No                 |    |

#### Figure 5 H, BDNF

|                                            |                   |        |
|--------------------------------------------|-------------------|--------|
| Test for normal distribution               |                   |        |
| Shapiro-Wilk test                          |                   |        |
| W                                          | 0.8891            | 0.9055 |
| P value                                    | 0.3524            | 0.4410 |
| Passed normality test (alpha=0.05)?        | Yes               | Yes    |
| P value summary                            | ns                | ns     |
| Number of values                           | 5                 | 5      |
| Table Analyzed                             | SVZ BDNF P21 Post |        |
| Column B                                   | PostVPA           |        |
| vs.                                        | vs.               |        |
| Column A                                   | Control           |        |
| Unpaired t test                            |                   |        |
| P value                                    | 0.1686            |        |
| P value summary                            | ns                |        |
| Significantly different (P < 0.05)?        | No                |        |
| One- or two-tailed P value?                | Two-tailed        |        |
| t, df                                      | t=1.513, df=8     |        |
| How big is the difference?                 |                   |        |
| Mean of column A                           | 220.0             |        |
| Mean of column B                           | 300.1             |        |
| Difference between means (B - A) $\pm$ SEM | 80.11 $\pm$ 52.93 |        |
| 95% confidence interval                    | -41.95 to 202.2   |        |
| R squared (eta squared)                    | 0.2226            |        |
| F test to compare variances                |                   |        |
| F, DF <sub>n</sub> , D <sub>fd</sub>       | 3.298, 4, 4       |        |



|                                     |        |
|-------------------------------------|--------|
| P value                             | 0.2745 |
| P value summary                     | ns     |
| Significantly different (P < 0.05)? | No     |

### Figure 5 H, NT-3

|                                        |                  |                 |
|----------------------------------------|------------------|-----------------|
| Test for normal distribution           |                  |                 |
| Shapiro-Wilk test                      |                  |                 |
| W                                      | 0.8813           | 0.9137          |
| P value                                | 0.2750           | 0.4902          |
| Passed normality test (alpha=0.05)?    | Yes              | Yes             |
| P value summary                        | ns               | ns              |
| Number of values                       | 6                | 5               |
| Table Analyzed                         | SVZ Nt3 P21 Post |                 |
| Column B                               |                  | PostVPA         |
| vs.                                    |                  | vs.             |
| Column A                               |                  | Control         |
| Unpaired t test                        |                  |                 |
| P value                                |                  | 0.9830          |
| P value summary                        |                  | ns              |
| Significantly different (P < 0.05)?    |                  | No              |
| One- or two-tailed P value?            |                  | Two-tailed      |
| t, df                                  |                  | t=0.02193, df=9 |
| How big is the difference?             |                  |                 |
| Mean of column A                       |                  | 98.38           |
| Mean of column B                       |                  | 97.92           |
| Difference between means (B - A) ± SEM |                  | -0.4633 ± 21.13 |
| 95% confidence interval                |                  | -48.26 to 47.33 |
| R squared (eta squared)                |                  | 5.343e-005      |
| F test to compare variances            |                  |                 |
| F, DFn, Dfd                            |                  | 5.673, 4, 5     |
| P value                                |                  | 0.0845          |
| P value summary                        |                  | ns              |
| Significantly different (P < 0.05)?    |                  | No              |

### Figure 5 H, IGF

|                                     |                  |         |
|-------------------------------------|------------------|---------|
| Test for normal distribution        |                  |         |
| Shapiro-Wilk test                   |                  |         |
| W                                   | 0.9403           | 0.7996  |
| P value                             | 0.6677           | 0.0582  |
| Passed normality test (alpha=0.05)? | Yes              | Yes     |
| P value summary                     | ns               | ns      |
| Number of values                    | 5                | 6       |
| Table Analyzed                      | SVZ IGF P21 Post |         |
| Column B                            |                  | PostVPA |
| vs.                                 |                  | vs.     |
| Column A                            |                  | Control |
| Unpaired t test                     |                  |         |
| P value                             |                  | 0.0046  |
| P value summary                     |                  | **      |

|                                                |                    |
|------------------------------------------------|--------------------|
| Significantly different ( $P < 0.05$ )?        | Yes                |
| One- or two-tailed P value?                    | Two-tailed         |
| t, df                                          | $t=3.742$ , $df=9$ |
| How big is the difference?                     |                    |
| Mean of column A                               | 138.4              |
| Mean of column B                               | 281.3              |
| Difference between means ( $B - A$ ) $\pm$ SEM | $142.9 \pm 38.18$  |
| 95% confidence interval                        | 56.50 to 229.2     |
| R squared (eta squared)                        | 0.6087             |
| F test to compare variances                    |                    |
| F, DFn, Dfd                                    | 18.90, 5, 4        |
| P value                                        | 0.0138             |
| P value summary                                | *                  |
| Significantly different ( $P < 0.05$ )?        | Yes                |

Prefrontal cortex, PND14

Western blotting results

| Group   | Protein | p      | t     | df | Figure  |
|---------|---------|--------|-------|----|---------|
| Control | GFAP    | 0.0001 | 11.31 | 10 | Fig 2 A |
| PreVPA  |         |        |       |    |         |
| Control |         | 0.0001 | 9.087 | 10 | Fig 2 C |
| PostVPA |         |        |       |    |         |
| Control | DCX     | 0.4625 | 0.764 | 10 | Fig 2 A |
| PreVPA  |         | 0.0576 | 2.144 | 10 | Fig 2 C |
| Control |         |        |       |    |         |
| PostVPA |         |        |       |    |         |
| Control | NeuN    | 0.0001 | 8.853 | 10 | Fig 2 A |
| PreVPA  |         | 0.0537 | 2.186 | 10 | Fig 2 C |
| Control |         |        |       |    |         |
| PostVPA |         |        |       |    |         |
| Control | SYP     | 0.0001 | 12.96 | 10 | Fig 2 A |
| PreVPA  |         | 0.0001 | 6.019 | 10 | Fig 2 C |
| Control |         |        |       |    |         |
| PostVPA |         |        |       |    |         |

Prefrontal cortex, PND21

Western blotting results

| Group   | Protein | p      | t      | df | Figure  |
|---------|---------|--------|--------|----|---------|
| Control | GFAP    | 0.0001 | 8.229  | 10 | Fig 2 E |
| PreVPA  |         |        |        |    |         |
| Control |         | 0.0001 | 20.786 | 10 | Fig 2 G |
| PostVPA |         |        |        |    |         |
| Control | DCX     | 0.0718 | 2.013  | 10 | Fig 2 E |
| PreVPA  |         | 0.8221 | 0.2309 | 10 | Fig 2 G |
| Control |         |        |        |    |         |
| PostVPA |         |        |        |    |         |
| Control | NeuN    | 0.0001 | 24.25  | 10 | Fig 2 E |
| PreVPA  |         | 0.1125 | 1.740  | 10 | Fig 2 G |
| Control |         |        |        |    |         |
| PostVPA |         |        |        |    |         |
| Control | SYP     | 0.0001 | 12.40  | 10 | Fig 2 E |
| PreVPA  |         | 0.0001 | 8.207  | 10 | Fig 2 G |
| Control |         |        |        |    |         |
| PostVPA |         |        |        |    |         |

Hippocampus, PND 14

Western blotting results

| Group   | Protein | p      | t      | df | Figure  |
|---------|---------|--------|--------|----|---------|
| Control | GFAP    | 0.0867 | 1.899  | 10 | Fig 3 A |
| PreVPA  |         |        |        |    |         |
| Control |         | 0.0023 | 4.050  | 10 | Fig 3 C |
| PostVPA |         |        |        |    |         |
| Control | DCX     | 0.0597 | 2.123  | 10 | Fig 3 A |
| PreVPA  |         |        |        |    |         |
| Control |         | 0.9739 | 0.0335 | 10 | Fig 3 C |
| PostVPA |         |        |        |    |         |
| Control | NeuN    | 0.8093 | 0.2478 | 10 | Fig 3 A |
| PreVPA  |         |        |        |    |         |
| Control |         | 0.0001 | 10.95  | 10 | Fig 3 C |
| PostVPA |         |        |        |    |         |
| Control | SYP     | 0.0564 | 2.157  | 10 | Fig 3 A |
| PreVPA  |         |        |        |    |         |
| Control |         | 0.6790 | 0.4262 | 10 | Fig 3 C |
| PostVPA |         |        |        |    |         |

Hippocampus, PND21

Western blotting

| Group   | Protein | p      | t     | df | Figure  |
|---------|---------|--------|-------|----|---------|
| Control | GFAP    | 0.0029 | 3.913 | 10 | Fig 3 E |
| PreVPA  |         |        |       |    |         |
| Control |         | 0.0001 | 8.169 | 10 | Fig 3 G |
| PostVPA |         |        |       |    |         |
| Control | DCX     | 0.0003 | 5.482 | 10 | Fig 3 E |
| PreVPA  |         |        |       |    |         |
| Control |         | 0.0003 | 5.438 | 10 | Fig 3 G |
| PostVPA |         |        |       |    |         |
| Control | NeuN    | 0.0028 | 3.935 | 10 | Fig 3 E |
| PreVPA  |         |        |       |    |         |
| Control |         | 0.3401 | 1.002 | 10 | Fig 3 G |
| PostVPA |         |        |       |    |         |
| Control | SYP     | 0.0001 | 15.48 | 10 | Fig 3 E |
| PreVPA  |         |        |       |    |         |
| Control |         | 0.0001 | 7.352 | 10 | Fig 3 G |
| PostVPA |         |        |       |    |         |

Olfactory bulb, PND14

Western blotting results

| Group   | Protein | p      | t      | df | Figure  |
|---------|---------|--------|--------|----|---------|
| Control | GFAP    | 0.0001 | 12.32  | 10 | Fig 4 A |
| PreVPA  |         |        |        |    |         |
| Control |         | 0.0001 | 20.786 | 10 | Fig 4 C |
| PostVPA |         |        |        |    |         |
| Control | DCX     | 0.1657 | 1.495  | 10 | Fig 4 A |
| PreVPA  |         |        |        |    |         |
| Control |         | 0.8221 | 0.2309 | 10 | Fig 4 C |
| PostVPA |         |        |        |    |         |
| Control | NeuN    | 0.3929 | 0.8928 | 10 | Fig 4 A |
| PreVPA  |         |        |        |    |         |
| Control |         | 0.1125 | 1.740  | 10 | Fig 4 C |
| PostVPA |         |        |        |    |         |

Olfactory bulb, PND21

Western blotting results

| Group   | Protein | p      | t      | df | Figure  |
|---------|---------|--------|--------|----|---------|
| Control | GFAP    | 0.9911 | 0.0114 | 10 | Fig 4 E |
| PreVPA  |         |        |        |    |         |
| Control |         | 0.0001 | 14.53  | 10 | Fig 4 G |
| PostVPA |         |        |        |    |         |
| Control | DCX     | 0.0001 | 10.12  | 10 | Fig 4 E |
| PreVPA  |         |        |        |    |         |
| Control |         | 0.0001 | 6.952  | 10 | Fig 4 G |
| PostVPA |         |        |        |    |         |
| Control | NeuN    | 0.2083 | 1.345  | 10 | Fig 4 E |
| PreVPA  |         |        |        |    |         |
| Control |         | 0.6943 | 0.4046 | 10 | Fig 4 G |
| PostVPA |         |        |        |    |         |

Prefrontal cortex, PND14

ELISA results

| Group   | Protein | p      | t      | df | Figure  |
|---------|---------|--------|--------|----|---------|
| Control | BDNF    | 0.68   | 0.4178 | 10 | Fig 2 B |
| PreVPA  |         |        |        |    |         |
| Control |         | 0.94   | 0.0819 | 10 | Fig 2 D |
| PostVPA |         |        |        |    |         |
| Control | NT3     | 0.025  | 2.676  | 10 | Fig 2 B |
| PreVPA  |         |        |        |    |         |
| Control |         | 0.0009 | 5.522  | 10 | Fig 2 D |
| PostVPA |         |        |        |    |         |
| Control | IGF     | 0.05   | 2.183  | 10 | Fig 2 B |
| PreVPA  |         |        |        |    |         |
| Control |         | 0.0014 | 4.388  | 10 | Fig 2 D |
| PostVPA |         |        |        |    |         |

Prefrontal cortex, PND21

ELISA results

| Group   | Protein | p      | t      | df | Figure  |
|---------|---------|--------|--------|----|---------|
| Control | BDNF    | 0.53   | 0.6484 | 8  | Fig 2 F |
| PreVPA  |         |        |        |    |         |
| Control |         | 0.17   | 1.476  | 9  | Fig 2 H |
| PostVPA |         |        |        |    |         |
| Control | NT3     | 0.086  | 1.925  | 9  | Fig 2 F |
| PreVPA  |         |        |        |    |         |
| Control |         | 0.87   | 0.1689 | 9  | Fig 2 H |
| PostVPA |         |        |        |    |         |
| Control | IGF     | 0.0001 | 7.239  | 8  | Fig 2 F |
| PreVPA  |         |        |        |    |         |
| Control |         | 0.0537 | 2.186  | 9  | Fig 2 H |
| PostVPA |         |        |        |    |         |

## Hippocampus PND14

### ELISA results

| Group   | Protein | p      | t     | df | Figure  |
|---------|---------|--------|-------|----|---------|
| Control | BDNF    | 0.0016 | 4.276 | 10 | Fig 3 B |
| PreVPA  |         |        |       |    |         |
| Control |         | 0.18   | 1.445 | 9  | Fig 3 D |
| PostVPA |         |        |       |    |         |
| Control | NT3     | 0.0007 | 5.769 | 7  | Fig 3 B |
| PreVPA  |         |        |       |    |         |
| Control |         | 0.0035 | 4.090 | 8  | Fig 3 D |
| PostVPA |         |        |       |    |         |
| Control | IGF     | 0.0001 | 7.133 | 9  | Fig 3 B |
| PreVPA  |         |        |       |    |         |
| Control |         | 0.004  | *U=0  |    | Fig 3 D |
| PostVPA |         |        |       |    |         |
| Control | GDNF    | 0.12   | 1.715 | 8  | Fig 3 B |
| PreVPA  |         |        |       |    |         |
| Control |         | 0.0001 | 7.286 | 8  | Fig 3 D |
| PostVPA |         |        |       |    |         |

\*Mann Whitney test

## Hippocampus PND21

### ELISA results

| Group   | Protein | p      | t     | df | Figure  |
|---------|---------|--------|-------|----|---------|
| Control | BDNF    | 0.0042 | 3.956 | 8  | Fig 3 F |
| PreVPA  |         |        |       |    |         |
| Control |         | 0.0057 | 3.506 | 10 | Fig 3 H |
| PostVPA |         |        |       |    |         |
| Control | NT3     | 0.0084 | 3.478 | 8  | Fig 3 F |
| PreVPA  |         |        |       |    |         |
| Control |         | 0.0001 | 12.94 | 8  | Fig 3 H |
| PostVPA |         |        |       |    |         |
| Control | IGF     | 0.0115 | 3.261 | 8  | Fig 3 F |
| PreVPA  |         |        |       |    |         |
| Control |         | 0.004  | *U=0  |    | Fig 3 H |
| PostVPA |         |        |       |    |         |
| Control | GDNF    | 0.01   | 3.198 | 8  | Fig 3 F |
| PreVPA  |         |        |       |    |         |
| Control |         | 0.0007 | 4.796 | 10 | Fig 3 H |
| PostVPA |         |        |       |    |         |

\* Mann Whitney test

# Olfactory bulb PND14

## ELISA results

| Group   | Protein | p      | t      | df | Figure  |         |
|---------|---------|--------|--------|----|---------|---------|
| Control | BDNF    | 0.0002 | 6.345  | 10 | Fig 4 B |         |
| PreVPA  |         |        |        |    |         |         |
| Control |         | 0.008  | *U=0   |    | Fig 4 D |         |
| PostVPA |         |        |        |    |         |         |
| Control | NT3     | 0.72   | 0.3692 | 10 | Fig 4 B |         |
| PreVPA  |         |        |        |    |         |         |
| Control |         | 0.16   | 1.522  |    | 10      | Fig 4 D |
| PostVPA |         |        |        |    |         |         |
| Control | IGF     | 0.05   | 2.255  | 10 | Fig 4 B |         |
| PreVPA  |         |        |        |    |         |         |
| Control |         | 0.002  | 4.214  |    | 10      | Fig 4 D |
| PostVPA |         |        |        |    |         |         |
| Control | GDNF    | 0.09   | 1.938  | 8  | Fig 4 B |         |
| PreVPA  |         |        |        |    |         |         |
| Control |         | 0.97   | 0.0355 |    | 8       | Fig 4 D |
| PostVPA |         |        |        |    |         |         |

\* Mann Whitney test

# Olfactory bulb PNd21

## ELISA results

| Group   | Protein | p       | t      | df | Figure  |
|---------|---------|---------|--------|----|---------|
| Control | BDNF    | 0.0001  | 11.31  | 10 | Fig 4 F |
| PreVPA  |         |         |        |    |         |
| Control |         | 0.0314  | 2.501  | 10 | Fig 4 H |
| PostVPA |         |         |        |    |         |
| Control | NT3     | 0..0001 | 13.97  | 8  | Fig 4 F |
| PreVPA  |         |         |        |    |         |
| Control |         | 0.26    | 1.207  | 10 | Fig 4 H |
| PostVPA |         |         |        |    |         |
| Control | IGF     | 0.0752  | 2.044  | 8  | Fig 4 F |
| PreVPA  |         |         |        |    |         |
| Control |         | 0.0041  | 3.695  | 10 | Fig 4 H |
| PostVPA |         |         |        |    |         |
| Control | GDNF    | 0.008   | *U=0   |    | Fig 4 F |
| PreVPA  |         |         |        |    |         |
| Control |         | 081     | 0.2424 | 10 | Fig 4 H |
| PostVPA |         |         |        |    |         |

\* Mann Whitney test



# Subventricular zone PND14

## ELISA results

| Group   | Protein | p     | t     | df | Figure  |
|---------|---------|-------|-------|----|---------|
| Control | BDNF    | 0.008 | *U=0  |    | Fig 5 A |
| PreVPA  |         |       |       |    |         |
| Control |         | 0.005 | 3.882 | 8  | Fig 5 B |
| PostVPA |         |       |       |    |         |
| Control | NT3     | 0.026 | 2.723 | 8  | Fig 5 A |
| PreVPA  |         |       |       |    |         |
| Control |         | 0.005 | 4.373 | 6  | Fig 5 B |
| PostVPA |         |       |       |    |         |
| Control | IGF     | 0.004 | U=0   |    | Fig 5 A |
| PreVPA  |         |       |       |    |         |
| Control |         | 0.004 | U=0   |    | Fig 5 B |
| PostVPA |         |       |       |    |         |

\* Mann Whitney test

# Subventricular zone PND21

## ELISA results

| Group   | Protein | p      | t      | df | Figure  |
|---------|---------|--------|--------|----|---------|
| Control | BDNF    | 0.54   | 2.258  | 8  | Fig 5 C |
| PreVPA  |         |        |        |    |         |
| Control |         | 0.17   | 1.513  | 8  | Fig 5 D |
| PostVPA |         |        |        |    |         |
| Control | NT3     | 0.42   | 0.8564 | 8  | Fig 5 C |
| PreVPA  |         |        |        |    |         |
| Control |         | 0.98   | 0.0219 | 9  | Fig 5 D |
| PostVPA |         |        |        |    |         |
| Control | IGF     | 0.0001 | 11.31  | 8  | Fig 5 C |
| PreVPA  |         |        |        |    |         |
| Control |         | 0.02   | *U=2   |    | Fig 5 D |
| PostVPA |         |        |        |    |         |

\* Mann Whitney test

## **Specificity of the primary and secondary antibodies used in the current study**

1. A polyclonal rabbit antibody anti-GFAP, Dako, Z0334.

<https://www.citeab.com/antibodies/2452274-z0334-glial-fibrillary-acidic-protein-gfap>

Cited in 4043 publications.

2. A monoclonal mouse antibody anti-DCX, sc-271390

<https://www.scbt.com/p/doublecortin-antibody-e-6?srltid=AfmBOop79Xkvkk4s-rU-5vs5dV2JusXPNN8Ec1QJEg-IWFtJDC5pd1Ny>

Cited in 131 publications.

3. A monoclonal mouse antibody anti-NeuN, MAB377.

<https://www.citeab.com/antibodies/226230-mab377-anti-neun-antibody-clone-a60>

Cited in 6998 publication.

4. A monoclonal mouse antibody anti-synaptophysin, SAB4200544

<https://www.citeab.com/antibodies/2282735-sab4200544-anti-synaptophysin-antibody-mouse-monocl>

Cited in 18 publications.

5. Goat Anti-Rabbit IgG H&L, ab6721

<https://www.abcam.com/en-us/products/secondary-antibodies/goat-rabbit-igg-h-l-hrp-ab6721?srltid=AfmBOordkxuB3tUoOKaKnFXPxKtz9RuoO0RIkzRLBZQA2z3FO3mfgo8u>

Cited in 5946 publications.

6. Goat Anti-Mouse IgG H&L, ab97023

[https://www.abcam.com/en-us/products/secondary-antibodies/goat-mouse-igg-h-l-hrp-ab97023?srltid=AfmBOopusr2MyScINIMa3irSPfiko2a6l9IluuOD6PRqNa\\_MZXX9ENZt](https://www.abcam.com/en-us/products/secondary-antibodies/goat-mouse-igg-h-l-hrp-ab97023?srltid=AfmBOopusr2MyScINIMa3irSPfiko2a6l9IluuOD6PRqNa_MZXX9ENZt)

Cited in 367 publications.

7. Rabbit anti- $\beta$ -actin antibody, Cell signaling #4967

<https://www.cellsignal.com/products/primary-antibodies/b-actin-antibody/4967?srltid=AfmBOopUvcK4npdbBaMIL51drga4YtBNwkRCTPdetD5QNOiO5acKdZTo>

Cited in 3824 publications.
